# Supplementary material for: Green Synthesis of Oxoquinoline-1(2H)-Carboxamide as Antiproliferative and Antioxidant Agents: An Experimental and In-Silico Approach to High Altitude Related Disorders
Source: MDPI journal article supplement (doi:10.3390/molecules27010309), 2022-01-04
Supplement: s1 [file s1]

# Green Synthesis of Oxoquinoline-1(2H)-Carboxamide as Antiproliferative and Antioxidant Agents: An Experimental and In-Silico Approach to High Altitude Related Disorders

Amena Ali <sup>1,2,\*</sup>, Abuzer Ali <sup>3</sup>, Musarrat Husain Warsi <sup>4</sup>, Mohammad Akhlaquer Rahman <sup>4</sup>, Mohamed Jawed Ahsan <sup>5</sup> and Faizul Azam <sup>6</sup>

<sup>1</sup> High Altitude Research Center, Taif University, P.O. Box 11099, Taif 21944, Saudi Arabia; amrathore@tu.edu.sa

<sup>2</sup> Department of Pharmaceutical Chemistry, College of Pharmacy, Taif University, P.O. Box 11099, Taif 21944, Saudi Arabia; amrathore@tu.edu.sa

<sup>3</sup> Department of Pharmacognosy, College of Pharmacy, Taif University, P.O. Box 11099, Taif 21944, Saudi Arabia; abuali@tu.edu.sa

<sup>4</sup> Department of Pharmaceutics and Industrial Pharmacy, College of Pharmacy, Taif University, P.O. Box 11099, Taif 21944, Saudi Arabia; mvarsi@tu.edu.sa (M.H.W.); mrahman@tu.edu.sa (M.A.R.)

<sup>5</sup> Department of Pharmaceutical Chemistry, Maharishi Arvind College of Pharmacy, Ambabari Circle, Jaipur, Rajasthan 302 039, India; jawedpharma@gmail.com

<sup>6</sup> Department of Pharmaceutical Chemistry & Pharmacognosy, Unaizah College of Pharmacy, Qassim University, Unaizah 51911, Saudi Arabia; fazam@qu.edu.sa

\* Correspondence: amrathore@tu.edu.sa

## Supplementary Information

### Characterization of compounds 5a-j

**7-Hydroxy-4-methyl-2-oxo-N-phenylquinoline-1(2H)-carboxamide (5a):** <sup>1</sup>H NMR (300 MHz DMSO-*d*<sub>6</sub>): δ 2.34 (3H, s, CH<sub>3</sub>), 6.10 (1H, s, ArH, H8), 6.69 (1H, s, ArH, H3), 6.80 (1H, d, *J* = 6.1 Hz, ArH, H6), 6.85-6.87 (1H, m, *J* = 6.0 Hz, ArH, H4'), 7.17-7.22 (2H, m, ArH, H3' & H5'), 7.37-7.43 (2H, m, ArH, H2' & H6'), 7.58 (1H, d, *J* = 6.0 Hz, ArH, H5), 8.49 (1H, s, ArNH), 10.55 (1H, s, ArOH); <sup>13</sup>C NMR (75 MHz DMSO-*d*<sub>6</sub>): δ 161.21, 160.36, 156.07, 154.88, 153.57, 140.55, 128.80, 126.63, 121.11, 118.24, 117.80, 112.91, 110.28, 102.22, 18.13; Anal. Calc. for C<sub>17</sub>H<sub>14</sub>N<sub>2</sub>O<sub>3</sub>: C, 69.38; H, 4.79; N, 9.52 found: C, 69.12; H, 4.75; N, 9.40%. EI-MS *m/z* = 2941 (M)<sup>+</sup>,

**N-(4-Chlorophenyl)-7-hydroxy-4-methyl-2-oxoquinoline-1(2H)-carboxamide (5b):** <sup>1</sup>H NMR (300 MHz DMSO-*d*<sub>6</sub>): δ 2.34 (3H, s, CH<sub>3</sub>), 6.11 (1H, s, ArH, H8), 6.69 (1H, s, ArH, H3), 6.80 (1H, d, *J* = 6.3 Hz, ArH, H6), 7.23 (2H, d, *J* = 6.0 Hz, ArH, H3' & H5'), 7.39 (2H, d, *J* = 6.0 Hz, ArH, H2' & H6'), 7.57 (1H, d, *J* = 6.3 Hz, ArH, H5), 8.30 (1H, s, ArNH), 10.49 (1H, s, ArOH); <sup>13</sup>C NMR (75 MHz DMSO-*d*<sub>6</sub>): δ 161.15, 160.28, 153.50, 152.33, 139.80, 128.80, 126.58, 125.51, 124.51, 120.95, 119.82, 112.01, 110.25, 102.18, 18.09; Anal. Calc. for C<sub>17</sub>H<sub>13</sub>ClN<sub>2</sub>O<sub>3</sub>: C, 62.11; H, 3.99; N, 8.52 found: C, 62.05; H, 3.89; N, 8.40%. EI-MS *m/z* = 328.1 (M+H)<sup>+</sup>, 330.1 (M+2)<sup>+</sup>.

**7-Hydroxy-4-methyl-2-oxo-N-(p-tolyl)quinoline-1(2H)-carboxamide (5c):** <sup>1</sup>H NMR (300 MHz DMSO-*d*<sub>6</sub>): δ 2.21 (3H, s, CH<sub>3</sub>), 2.34 (3H, s, CH<sub>3</sub>), 6.11 (1H, s, ArH, H8), 6.69 (1H, s, ArH, H3), 6.81 (1H, d, *J* = 6.1 Hz, ArH, H6), 7.10 (2H, d, *J* = 6.1 Hz, ArH, H3' & H5'), 7.21 (1H, d, *J* = 6.1 Hz, ArH, H5), 7.34 (2H, d,

$J = 6.0$  Hz, ArH, H2' & H6'), 8.71 (1H, s, ArNH), 10.51 (1H, s, ArOH); Anal. Calc. for  $C_{18}H_{16}N_2O_3$ : C, 70.12; H, 5.23; N, 9.09 found: C, 70.02; H, 5.17; N, 9.01%. EI-MS  $m/z = 308.1$  (M)<sup>+</sup>.

**7-Hydroxy-N-(4-methoxyphenyl)-4-methyl-2-oxoquinoline-1(2H)-carboxamide (5d):**  $^1H$  NMR (300 MHz DMSO- $d_6$ ):  $\delta$  2.34 (3H, s, CH<sub>3</sub>), 3.69 (3H, s, OCH<sub>3</sub>), 6.09 (1H, s, ArH, H8), 6.68 (1H, s, ArH, H3), 6.76 (1H, d,  $J = 6.0$  Hz, ArH, H6), 6.85 (2H, d,  $J = 6.1$  Hz, ArH, H3' & H5'), 7.25 (2H, d,  $J = 6.1$  Hz, ArH, H2' & H6'), 7.55 (1H, d,  $J = 6.0$  Hz, ArH, H5), 8.31 (1H, s, ArNH), 10.50 (1H, s, ArOH);  $^{13}C$  NMR (75 MHz DMSO- $d_6$ ):  $\delta$  161.21, 160.38, 156.35, 154.89, 153.55, 133.67, 132.99, 126.60, 120.02, 119.65, 114.00, 112.91, 110.31, 102.24, 55.15, 18.13; Anal. Calc. for  $C_{18}H_{16}N_2O_3$ : C, 66.66; H, 4.97; N, 8.64 found: C, 66.56; H, 4.90; N, 8.60%. EI-MS  $m/z = 324.1$  (M)<sup>+</sup>.

**7-Hydroxy-4-methyl-2-oxo-N-(4-(trifluoromethyl)phenyl)quinoline-1(2H)-carboxamide (5e):**  $^1H$  NMR (300 MHz DMSO- $d_6$ ):  $\delta$  2.34 (3H, s, CH<sub>3</sub>), 6.10 (1H, s, ArH, H8), 6.68 (1H, s, ArH, H3), 6.79 (1H, d,  $J = 6.1$  Hz, ArH, H6), 7.27 (1H, d,  $J = 6.0$  Hz, ArH, H5), 7.46 (2H, d,  $J = 6.3$  Hz, ArH, H2' & H6'), 7.57 (2H, d,  $J = 6.2$  Hz, ArH, H3' & H5'), 8.54 (1H, s, ArNH), 10.52 (1H, s, ArOH); Anal. Calc. for  $C_{18}H_{13}F_3N_2O_3$ : C, 59.67; H, 3.62; N, 7.73 found: C, 59.56; H, 3.60; N, 7.70%. EI-MS  $m/z = 362.1$  (M)<sup>+</sup>.

**N-(2-Chlorophenyl)-7-hydroxy-4-methyl-2-oxoquinoline-1(2H)-carboxamide (5f):**  $^1H$  NMR (300 MHz DMSO- $d_6$ ):  $\delta$  2.34 (3H, s, CH<sub>3</sub>), 6.10 (1H, s, ArH, H8), 6.68 (1H, s, ArH, H3), 6.79 (1H, d,  $J = 6.2$  Hz, ArH, H6), 7.29-7.58 (4H, m, ArH), 8.01 (1H, d,  $J = 6.1$  Hz, ArH, H8), 8.21 (1H, s, ArNH), 10.51 (1H, s, OH);  $^{13}C$  NMR (75 MHz DMSO- $d_6$ ):  $\delta$  161.17, 160.31, 154.85, 153.53, 151.73, 136.78, 135.18, 129.24, 127.69, 126.60, 124.05, 122.50, 121.33, 112.87, 110.27, 102.20, 18.11; Anal. Calc. for  $C_{17}H_{13}ClN_2O_3$ : C, 62.11; H, 3.99; N, 8.52 found: C, 62.08; H, 3.92; N, 8.45%. EI-MS  $m/z = 328.1$  (M+H)<sup>+</sup>, 330.1 (M+2)<sup>+</sup>.

**7-Hydroxy-4-methyl-2-oxo-N-(o-tolyl)quinoline-1(2H)-carboxamide (5g):**  $^1H$  NMR (300 MHz DMSO- $d_6$ ):  $\delta$  2.19 (3H, s, CH<sub>3</sub>), 2.34 (3H, s, CH<sub>3</sub>), 6.09 (1H, s, ArH, H8), 6.69 (1H, s, ArH, H3), 6.78 (1H, d,  $J = 6.0$  Hz, ArH, H6), 7.09 (1H, d,  $J = 6.0$  Hz, ArH), 7.12-7.32 (4H, m, ArH), 8.67 (1H, s, ArNH), 10.52 (1H, s, ArOH); Anal. Calc. for  $C_{18}H_{16}N_2O_3$ : C, 70.12; H, 5.23; N, 9.09 found: C, 70.08; H, 5.19; N, 9.02%. EI-MS  $m/z = 308.1$  (M)<sup>+</sup>.

**7-Hydroxy-N-(2-methoxyphenyl)-4-methyl-2-oxoquinoline-1(2H)-carboxamide (5h):**  $^1H$  NMR (300 MHz DMSO- $d_6$ ):  $\delta$  2.34 (3H, s, CH<sub>3</sub>), 3.84 (3H, s, OCH<sub>3</sub>), 6.10 (1H, s, ArH, H8), 6.68 (1H, s, ArH, H3), 6.79 (1H, d,  $J = 6.1$  Hz, ArH, H6), 7.12 (1H, d,  $J = 6.0$  Hz, ArH, H5), 7.28-7.82 (4H, m, ArH), 8.57 (1H, s, ArNH), 10.52 (1H, s, ArOH); Anal. Calc. for  $C_{18}H_{16}N_2O_3$ : C, 66.66; H, 4.97; N, 8.64 found: C, 66.55; H, 4.91; N, 8.59%. EI-MS  $m/z = 324.1$  (M)<sup>+</sup>.

**N-(5-Chloro-2-hydroxyphenyl)-7-hydroxy-4-methyl-2-oxoquinoline-1(2H)-carboxamide (5i):**  $^1H$  NMR (300 MHz DMSO- $d_6$ ):  $\delta$  2.34 (3H, s, CH<sub>3</sub>), 6.11 (1H, s, ArH, H8), 6.67 (1H, s, ArH, H3), 6.82 (1H, d,  $J = 6.1$  Hz, ArH, H6), 6.89 (1H, d,  $J = 6.1$  Hz, ArH, H3), 7.02 (1H, d,  $J = 6.0$  Hz, ArH, H4), 7.09 (1H, d,  $J = 6.0$  Hz, ArH, H5), 7.82 (1H, s, ArH, H6'), 8.68 (1H, s, ArNH), 10.12 (1H, s, ArOH), 10.53 (1H, s, ArOH); Anal. Calc. for  $C_{17}H_{13}ClN_2O_3$ : C, 59.23; H, 3.80; N, 8.13 found: C, 59.19; H, 3.75; N, 8.09%. EI-MS  $m/z = 344.1$  (M)<sup>+</sup>.

**N-(3-Chloro-4-fluorophenyl)-7-hydroxy-4-methyl-2-oxoquinoline-1(2H)-carboxamide (5j):**  $^1H$  NMR (300 MHz DMSO- $d_6$ ):  $\delta$  2.35 (3H, s, CH<sub>3</sub>), 6.11 (1H, s, ArH, H3), 6.69 (1H, s, ArH, H8), 6.77 (2H, d,  $J = 6.1$  Hz, ArH, H6 & H5'), 7.56 (2H, d,  $J = 6.0$  Hz, ArH, H5 & H6'), 7.70 (1H, d,  $J = 6.1$  Hz, ArH, H2'), 8.41 (1H, s, ArNH), 10.49 (1H, s, OH);  $^{13}C$  NMR (75 MHz DMSO- $d_6$ ):  $\delta$  163.84, 161.13, 160.27, 154.82, 153.51, 150.52, 132.51, 126.59, 124.52, 122.81, 113.54, 112.84, 112.01, 110.23, 102.16, 18.11; Anal. Calc. for  $C_{17}H_{12}ClFN_2O_3$ : C, 58.89; H, 3.49; N, 5.48 found: C, 58.82; H, 3.45; N, 5.45%. EI-MS  $m/z = 346.1$  (M)<sup>+</sup>.

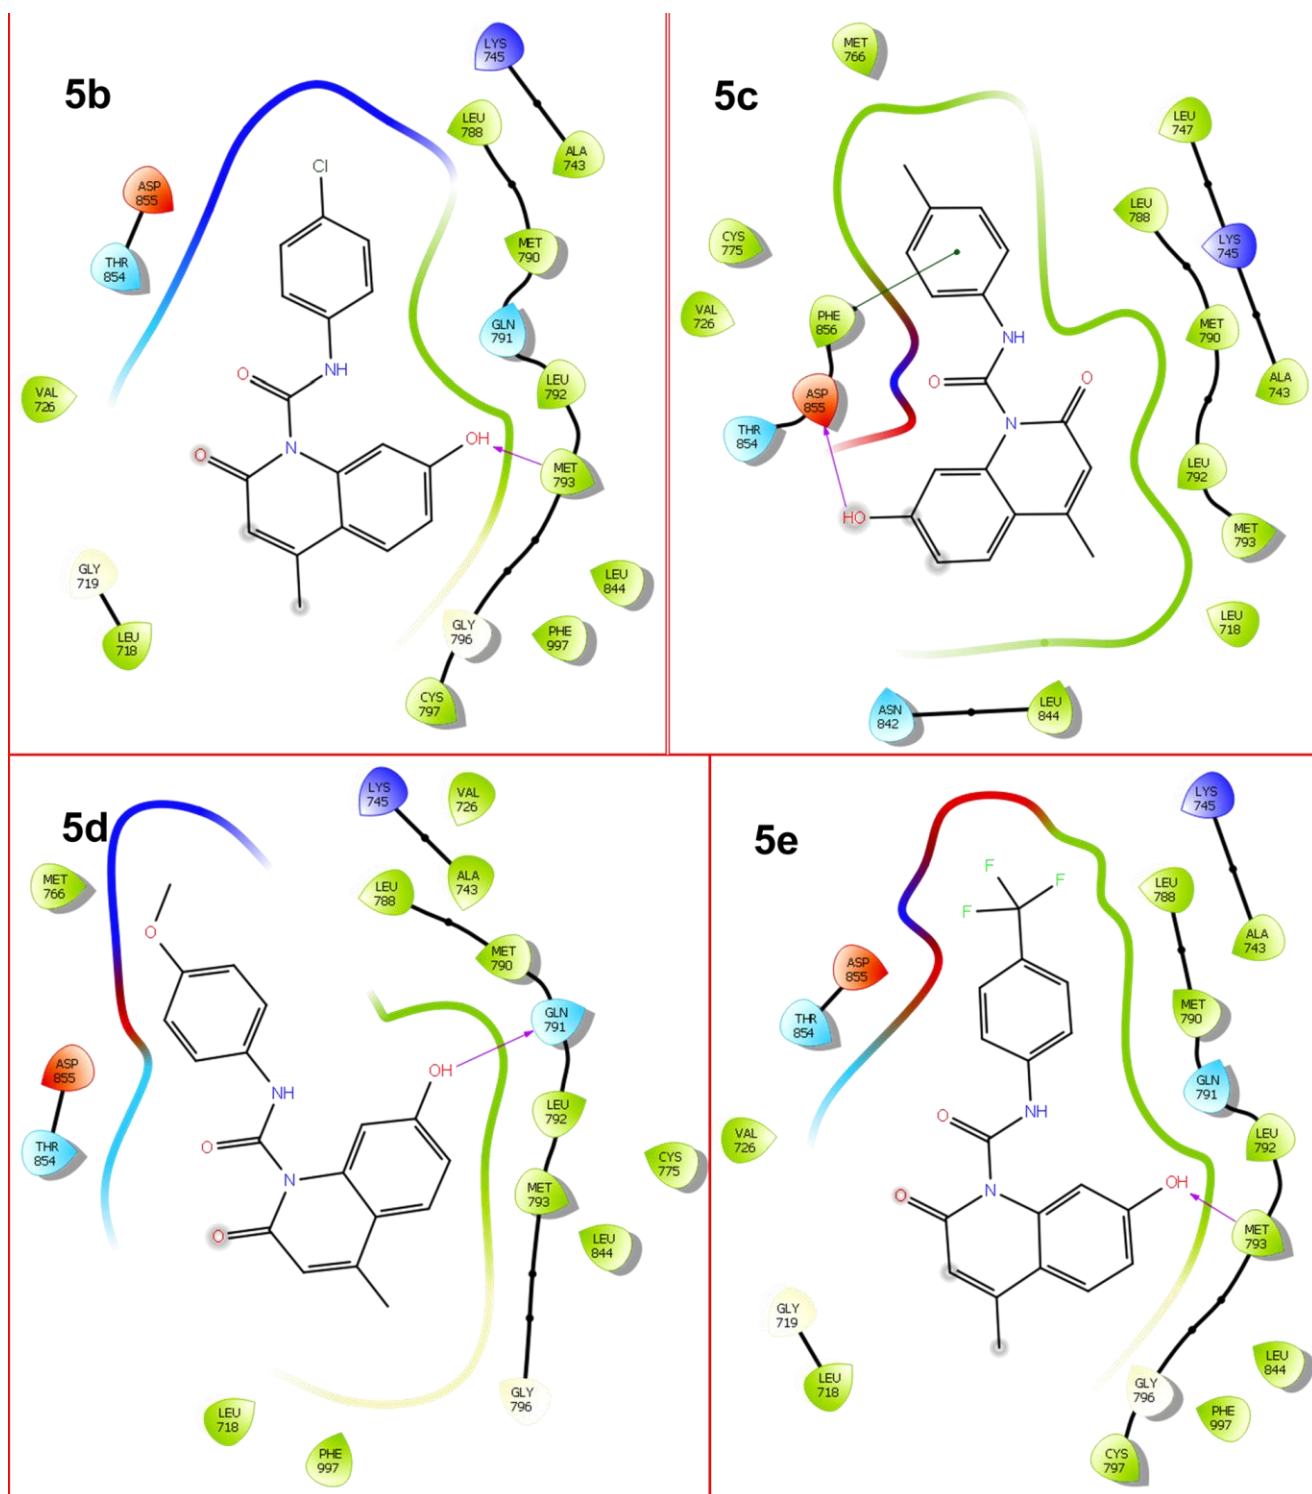

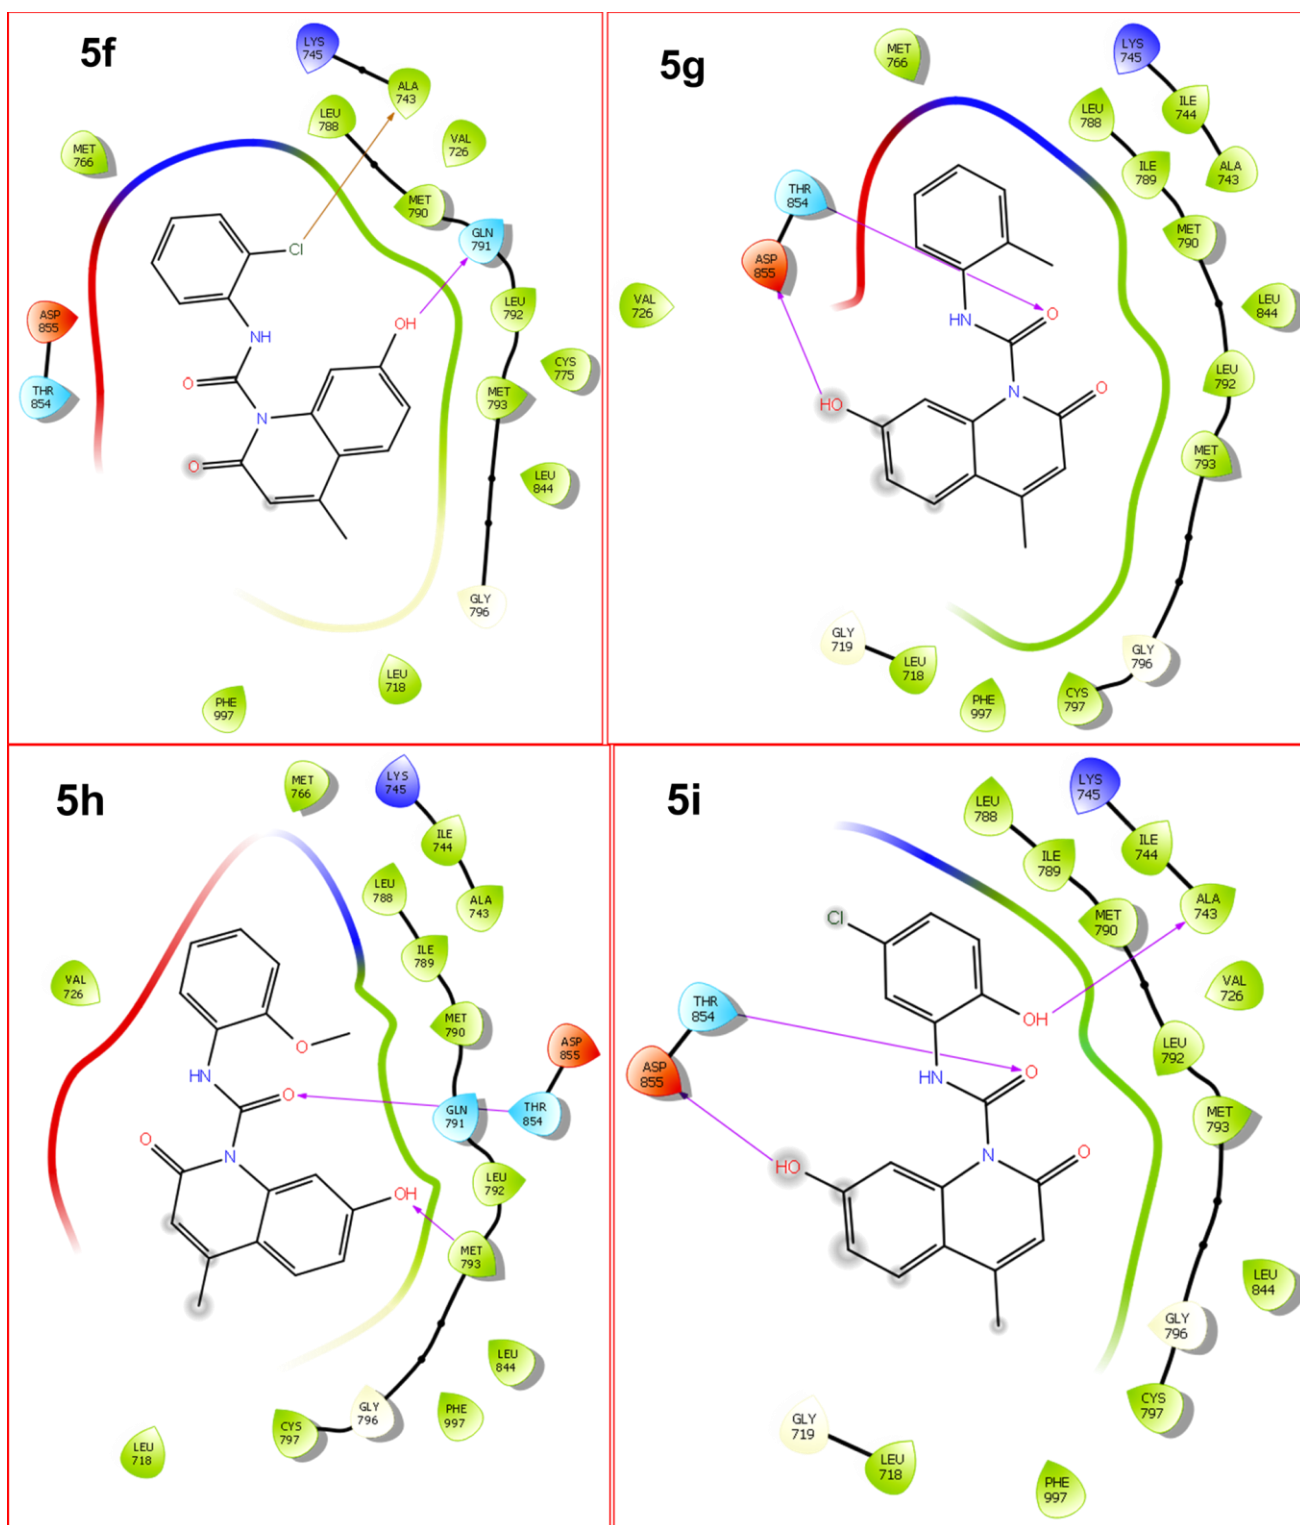

**Figure 1S.** The 2D interactions of ligands within the active site of EGFR



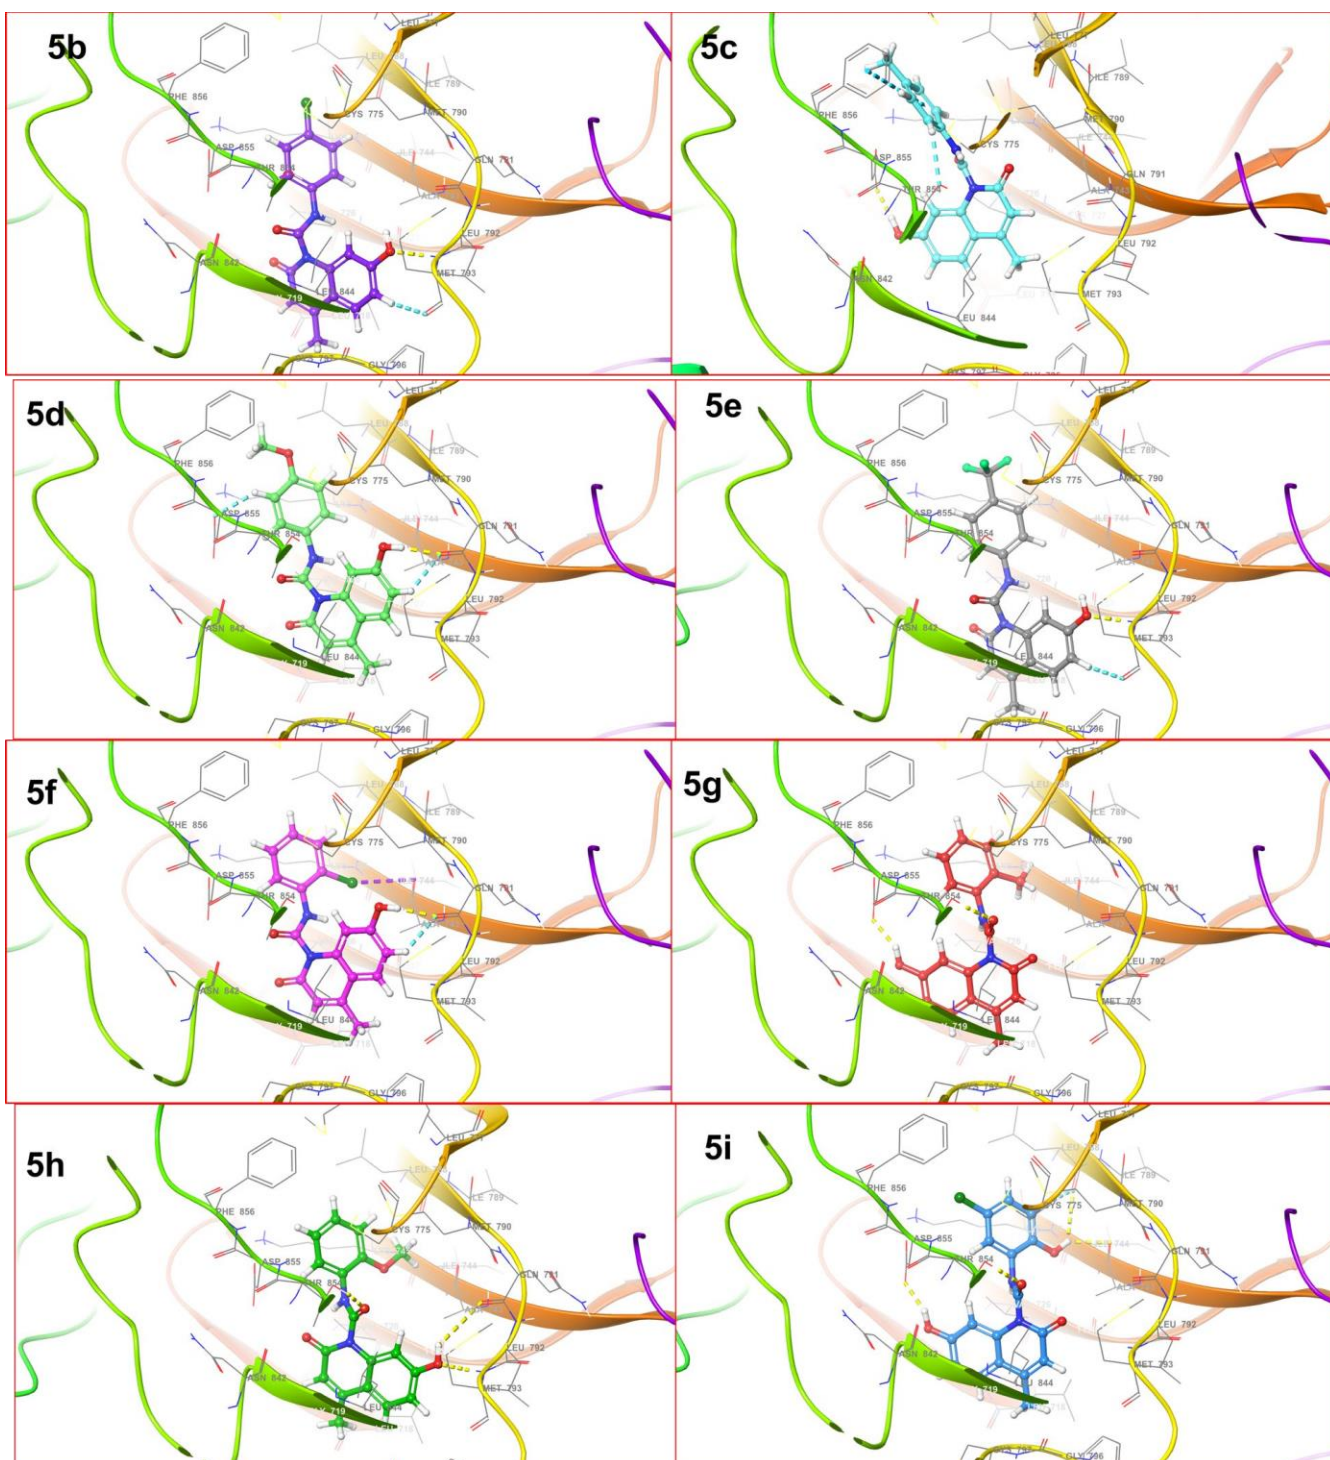

**Figure 2S.** The 3D interactions of ligands within the active site of EGFR.

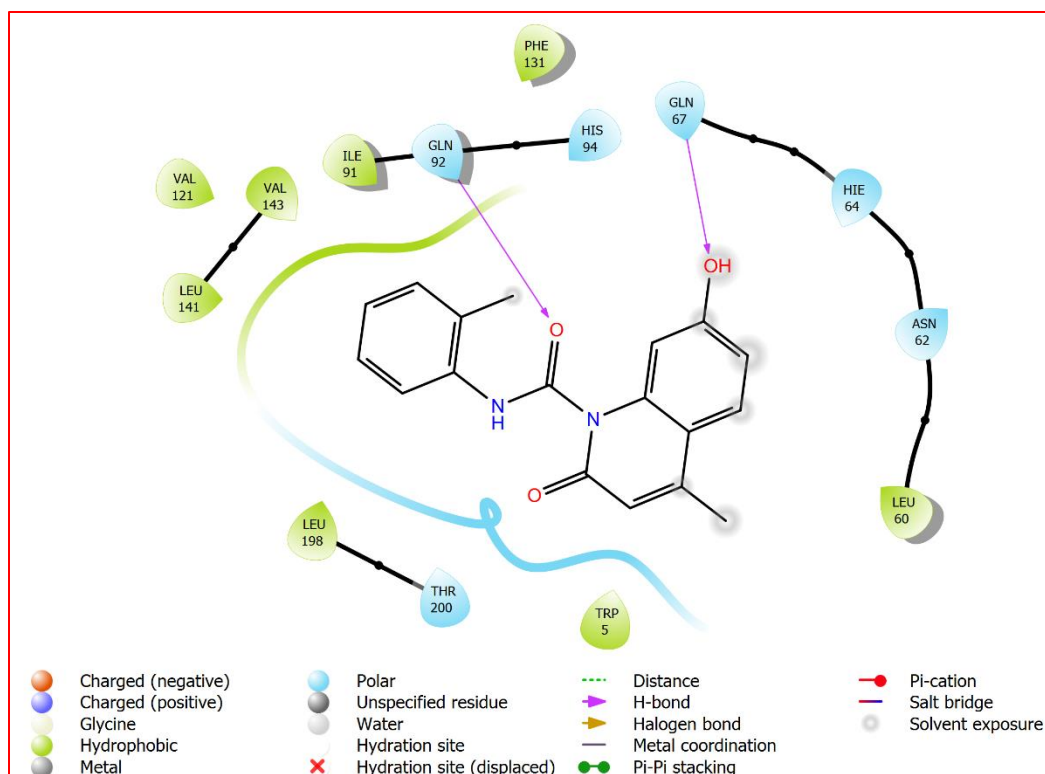

**Figure 3S.** The 3D interactions of ligand **5g** within the active site of CA IX.

**Table 1S.** The molecular docking results of compounds **5a-j** against CA IX (PDB ID: 3DC3).

| S. No. | Ligand    | Docking score | Types of interaction                                            |
|--------|-----------|---------------|-----------------------------------------------------------------|
| 1      | <b>5a</b> | -5.337        | H-bond (Gln67, Gln92, and Thr200)                               |
| 2      | <b>5b</b> | -4.175        | H-bond (Thr200)                                                 |
| 3      | <b>5c</b> | -4.788        | H-bond (Gln67 and Gln92)                                        |
| 4      | <b>5d</b> | -4.078        | H-bond (Gln92), $\pi$ - $\pi$ -Stacking (Phe131)                |
| 5      | <b>5e</b> | -4.977        | H-bond (Gln92), $\pi$ - $\pi$ -Stacking (Phe131)                |
| 6      | <b>5f</b> | -4.384        | H-bond (Gln67)                                                  |
| 7      | <b>5g</b> | -5.736        | H-bond (Gln67 and Gln92)                                        |
| 8      | <b>5h</b> | -5.643        | H-bond (Gln67 and Gln92)                                        |
| 9      | <b>5i</b> | -3.966        | H-bond (Hie64), $\pi$ - $\pi$ -Stacking (Phe131)                |
| 10     | <b>5j</b> | -4.291        | H-bond (Gln92, Hie64, and Pro201), Halogen bond (Trp5 and Hip4) |

Anticancer activity data of compounds 5a-j against 60 NCI cancer cell-lines

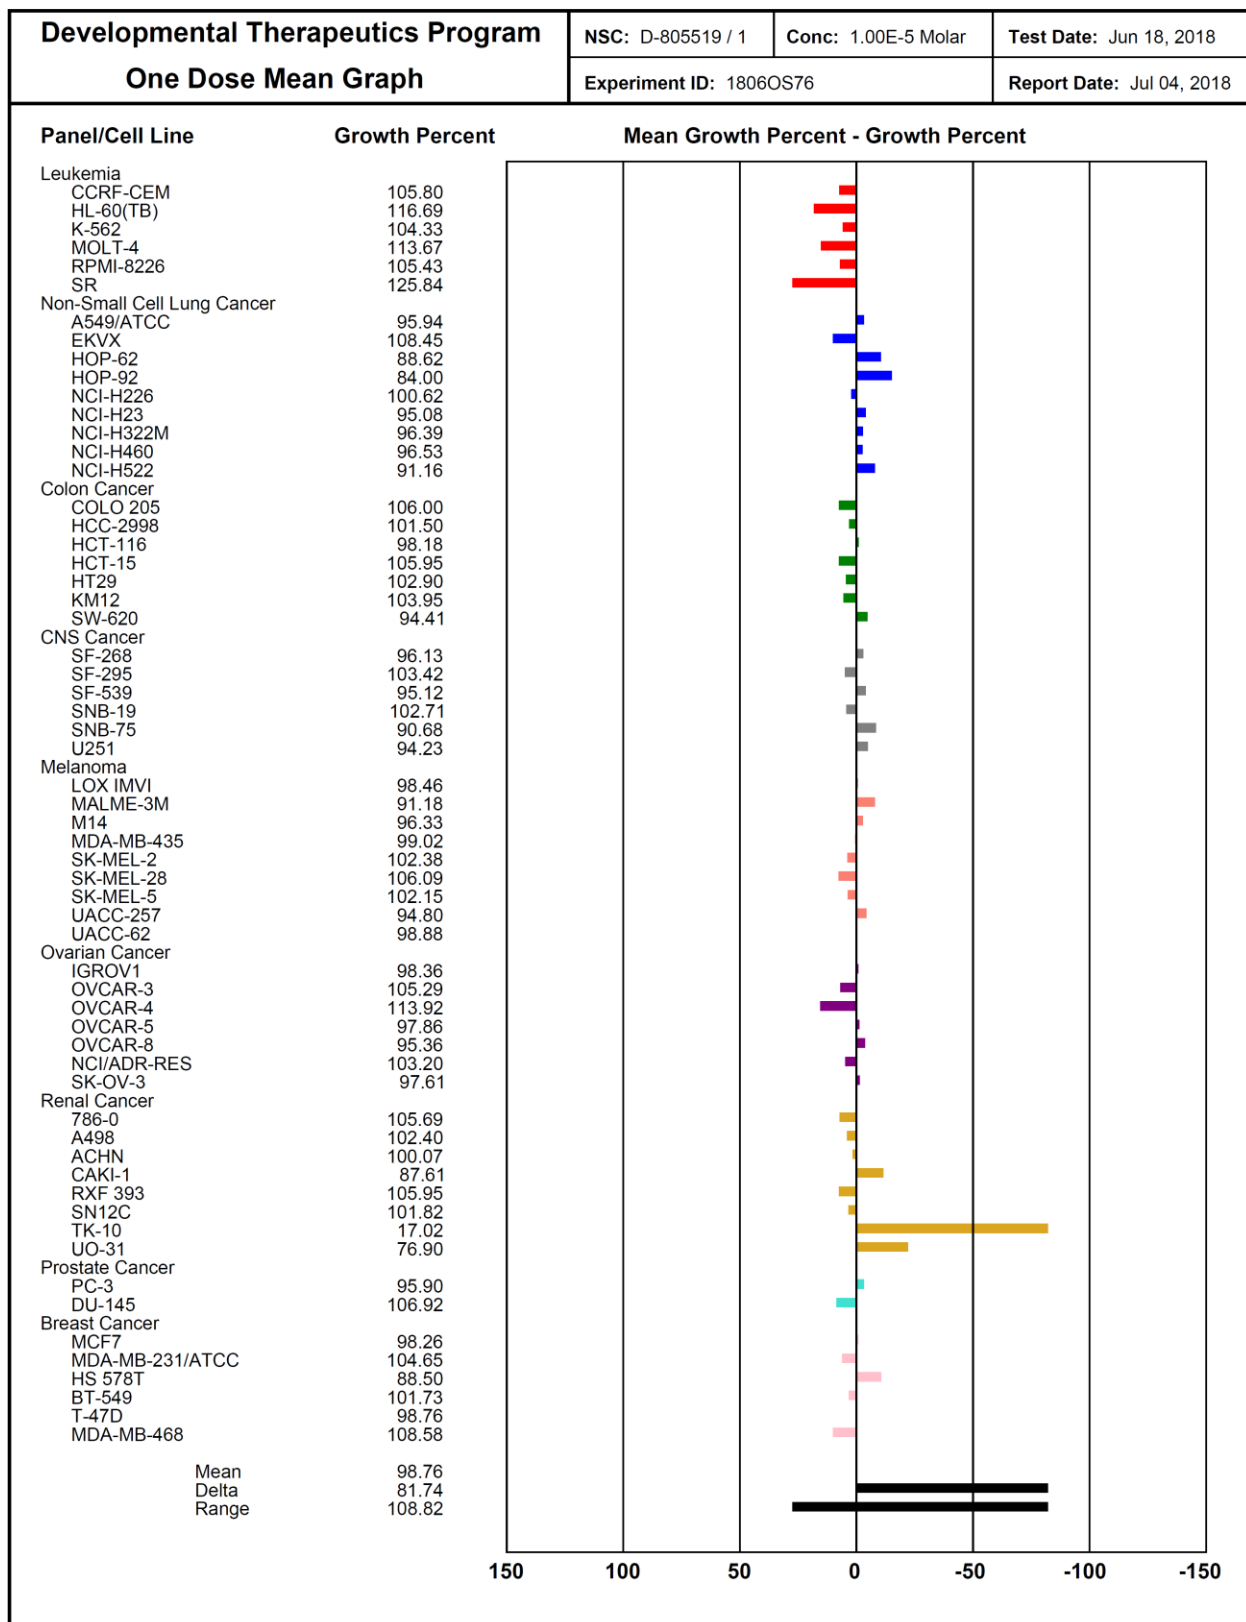

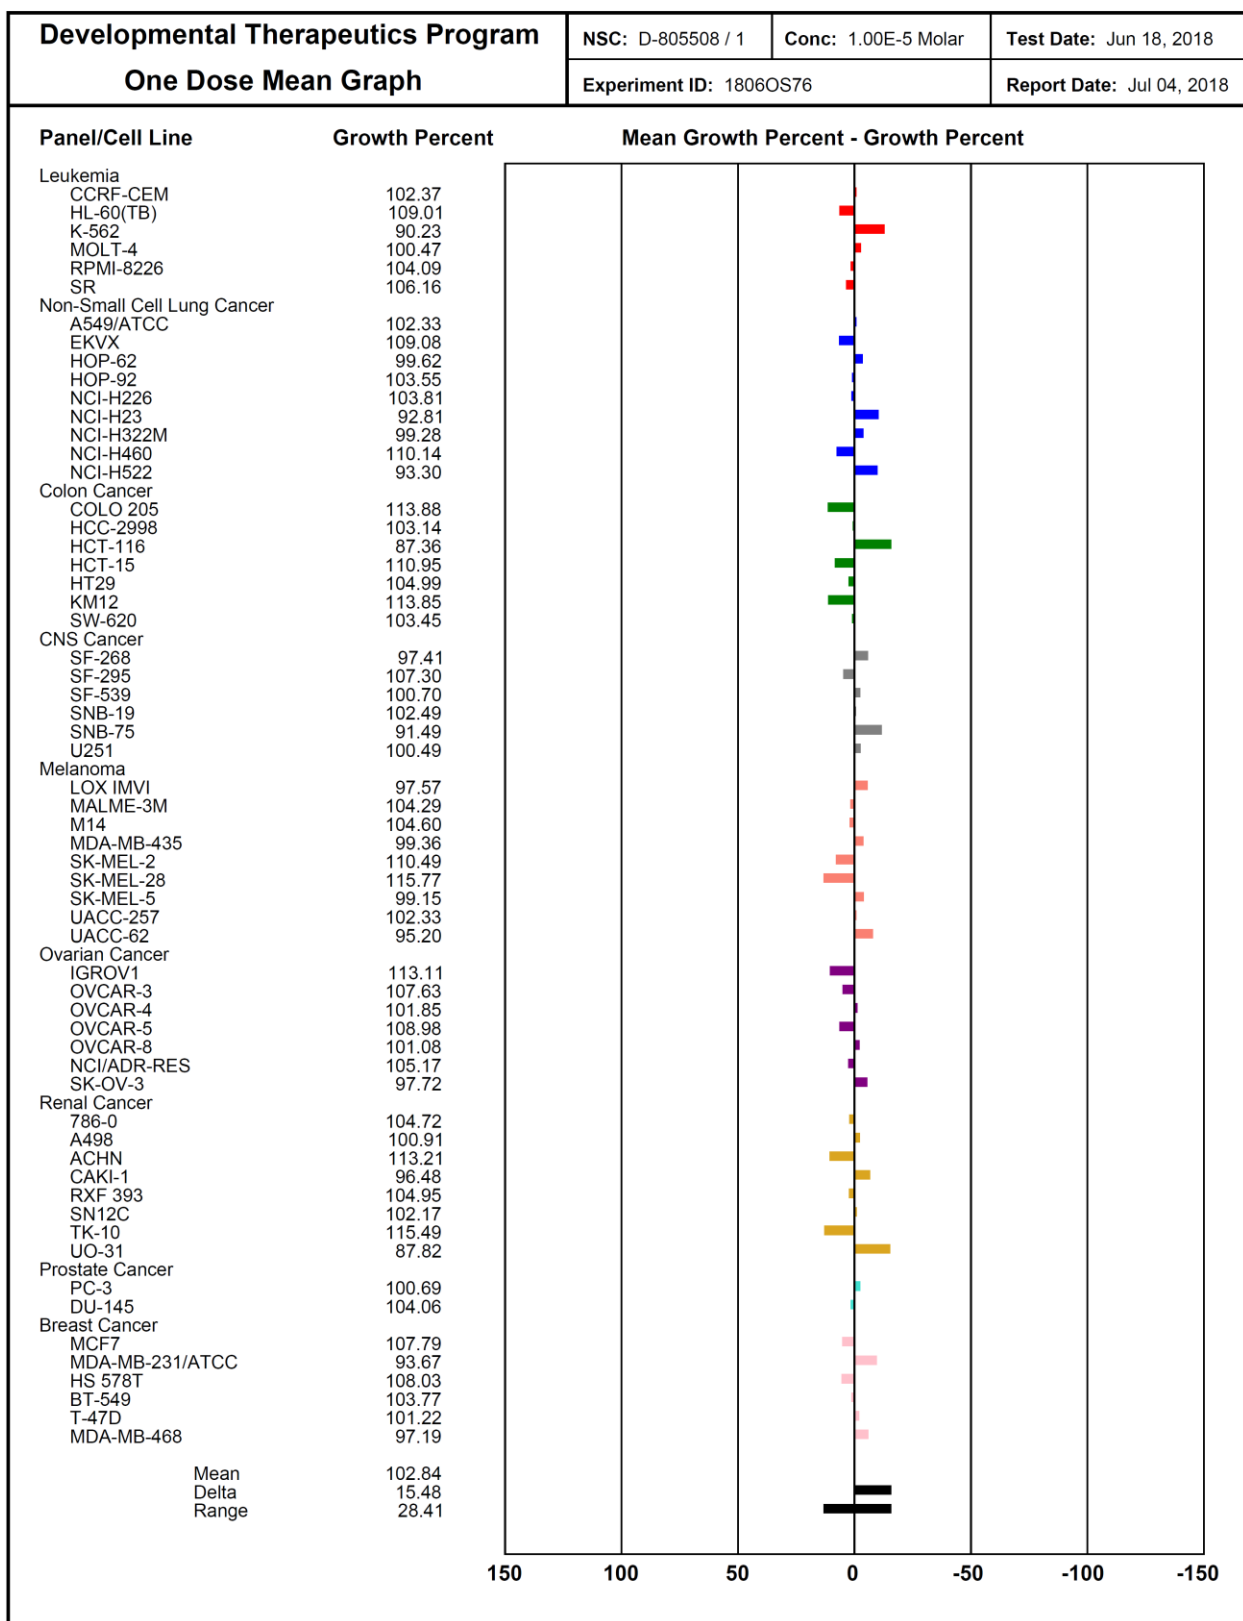



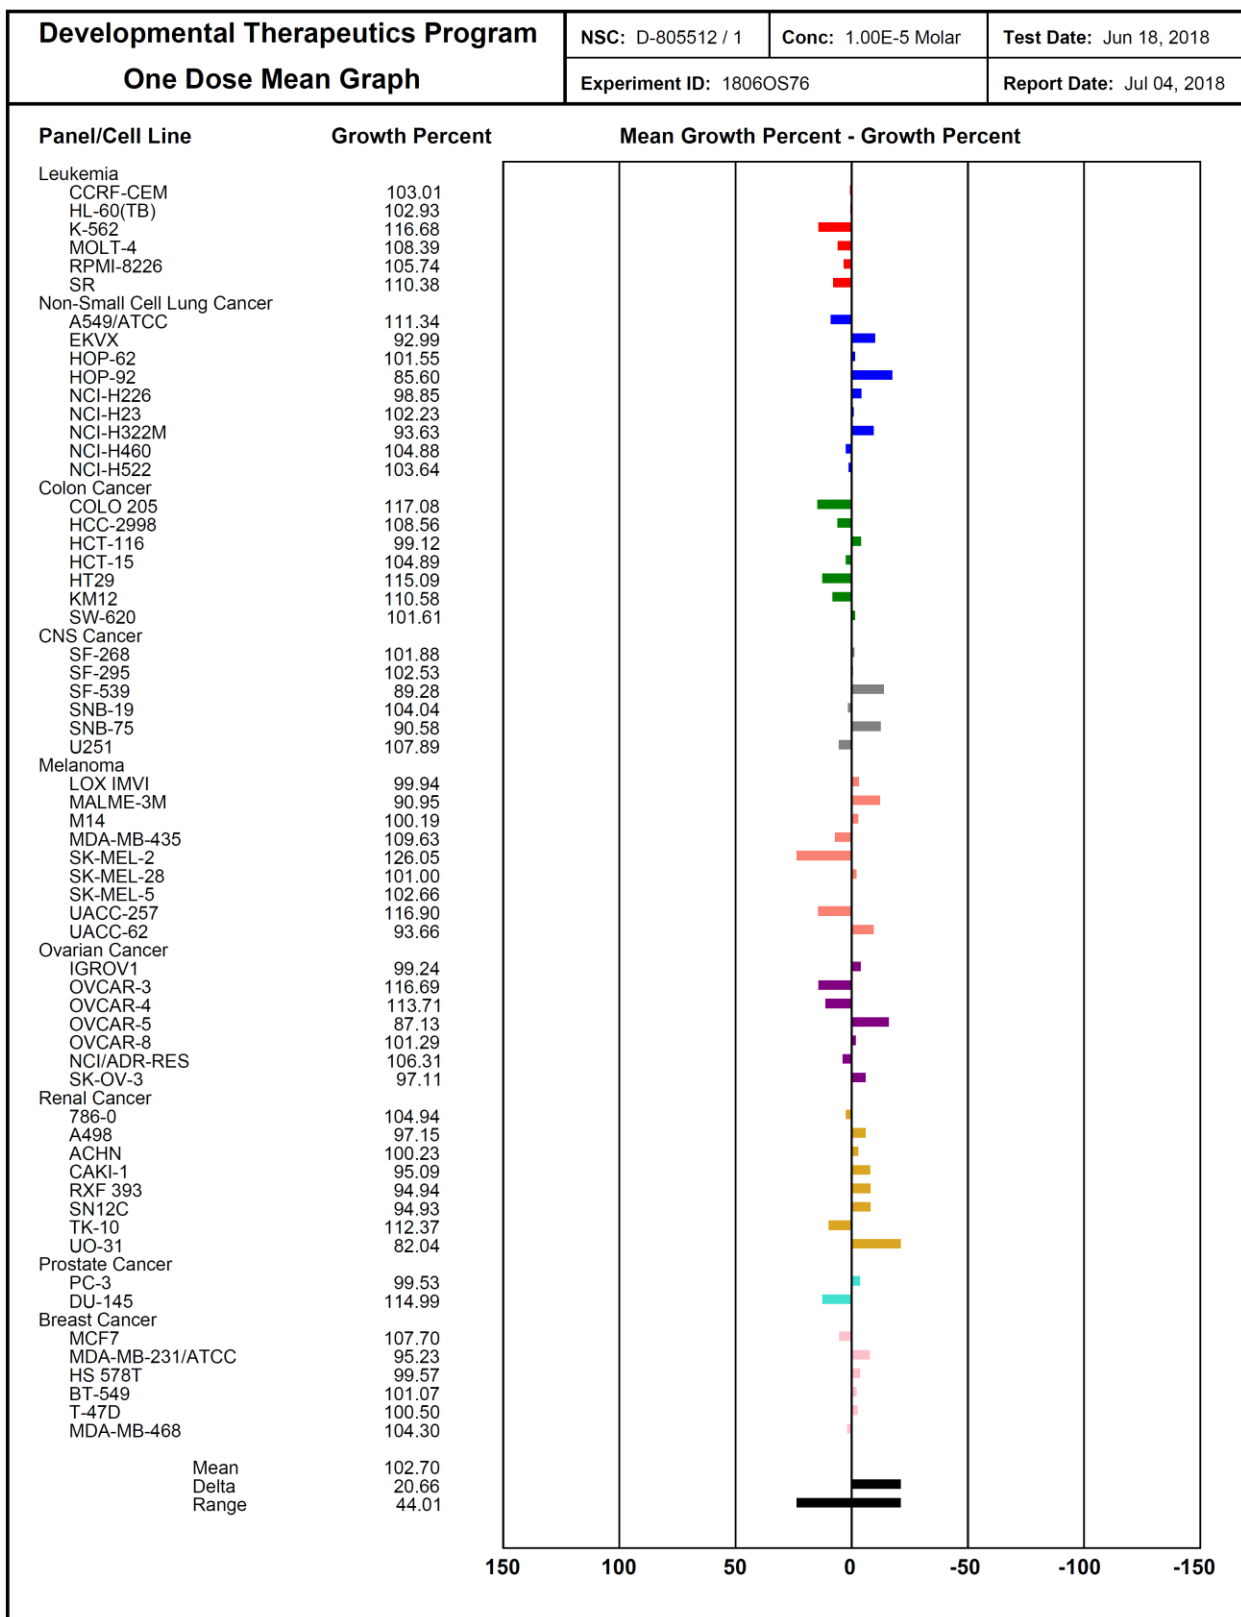

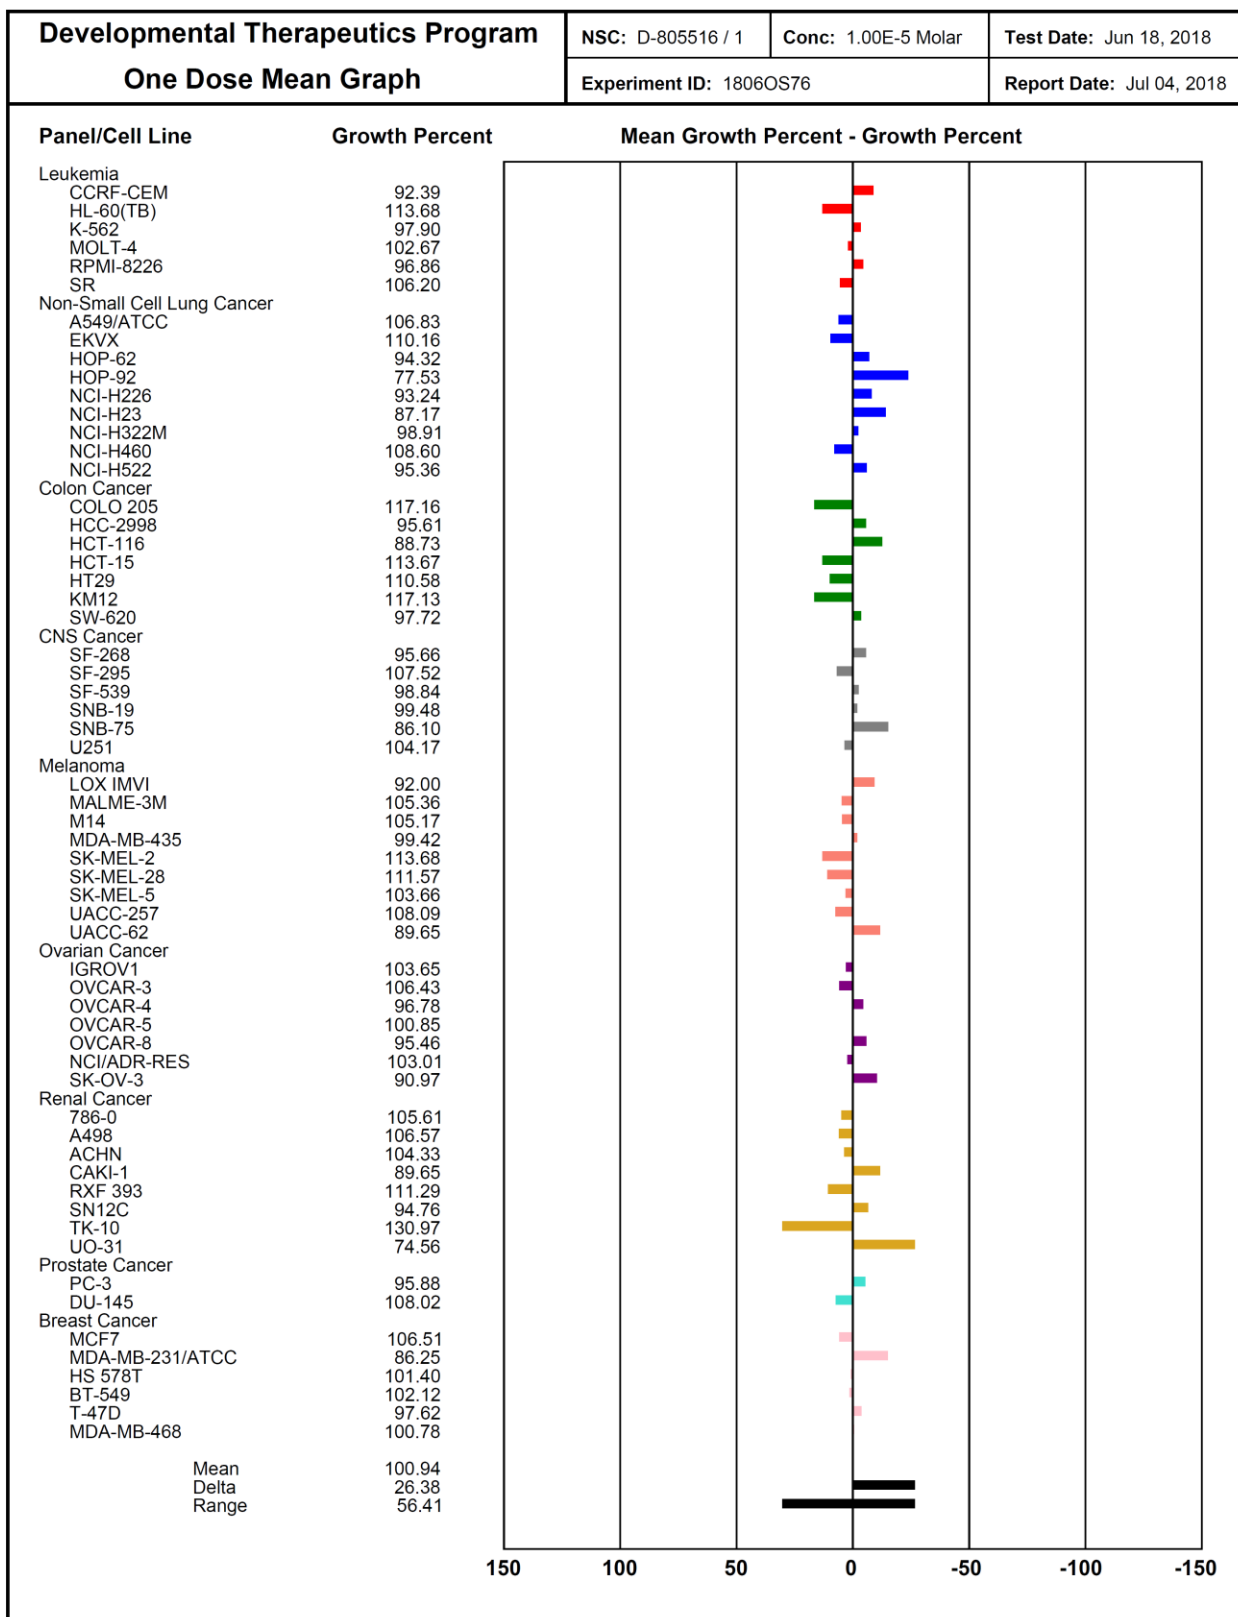

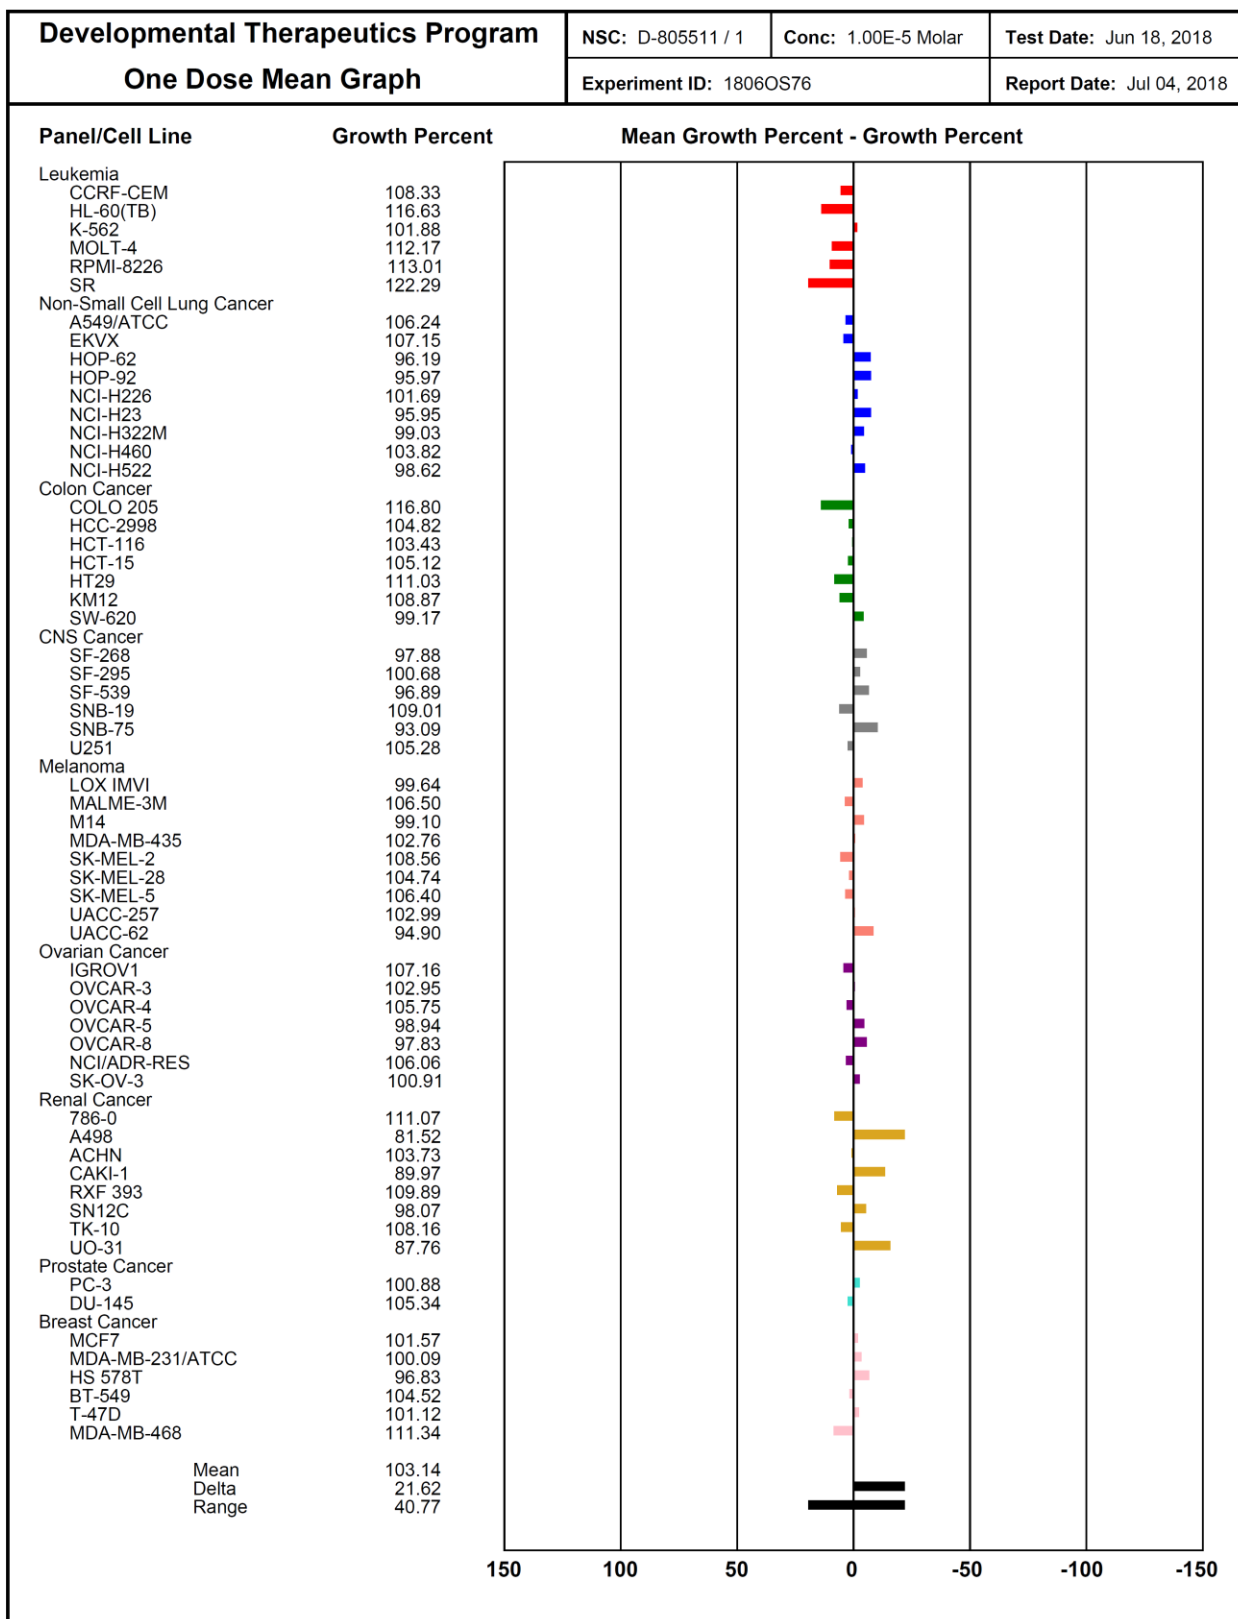

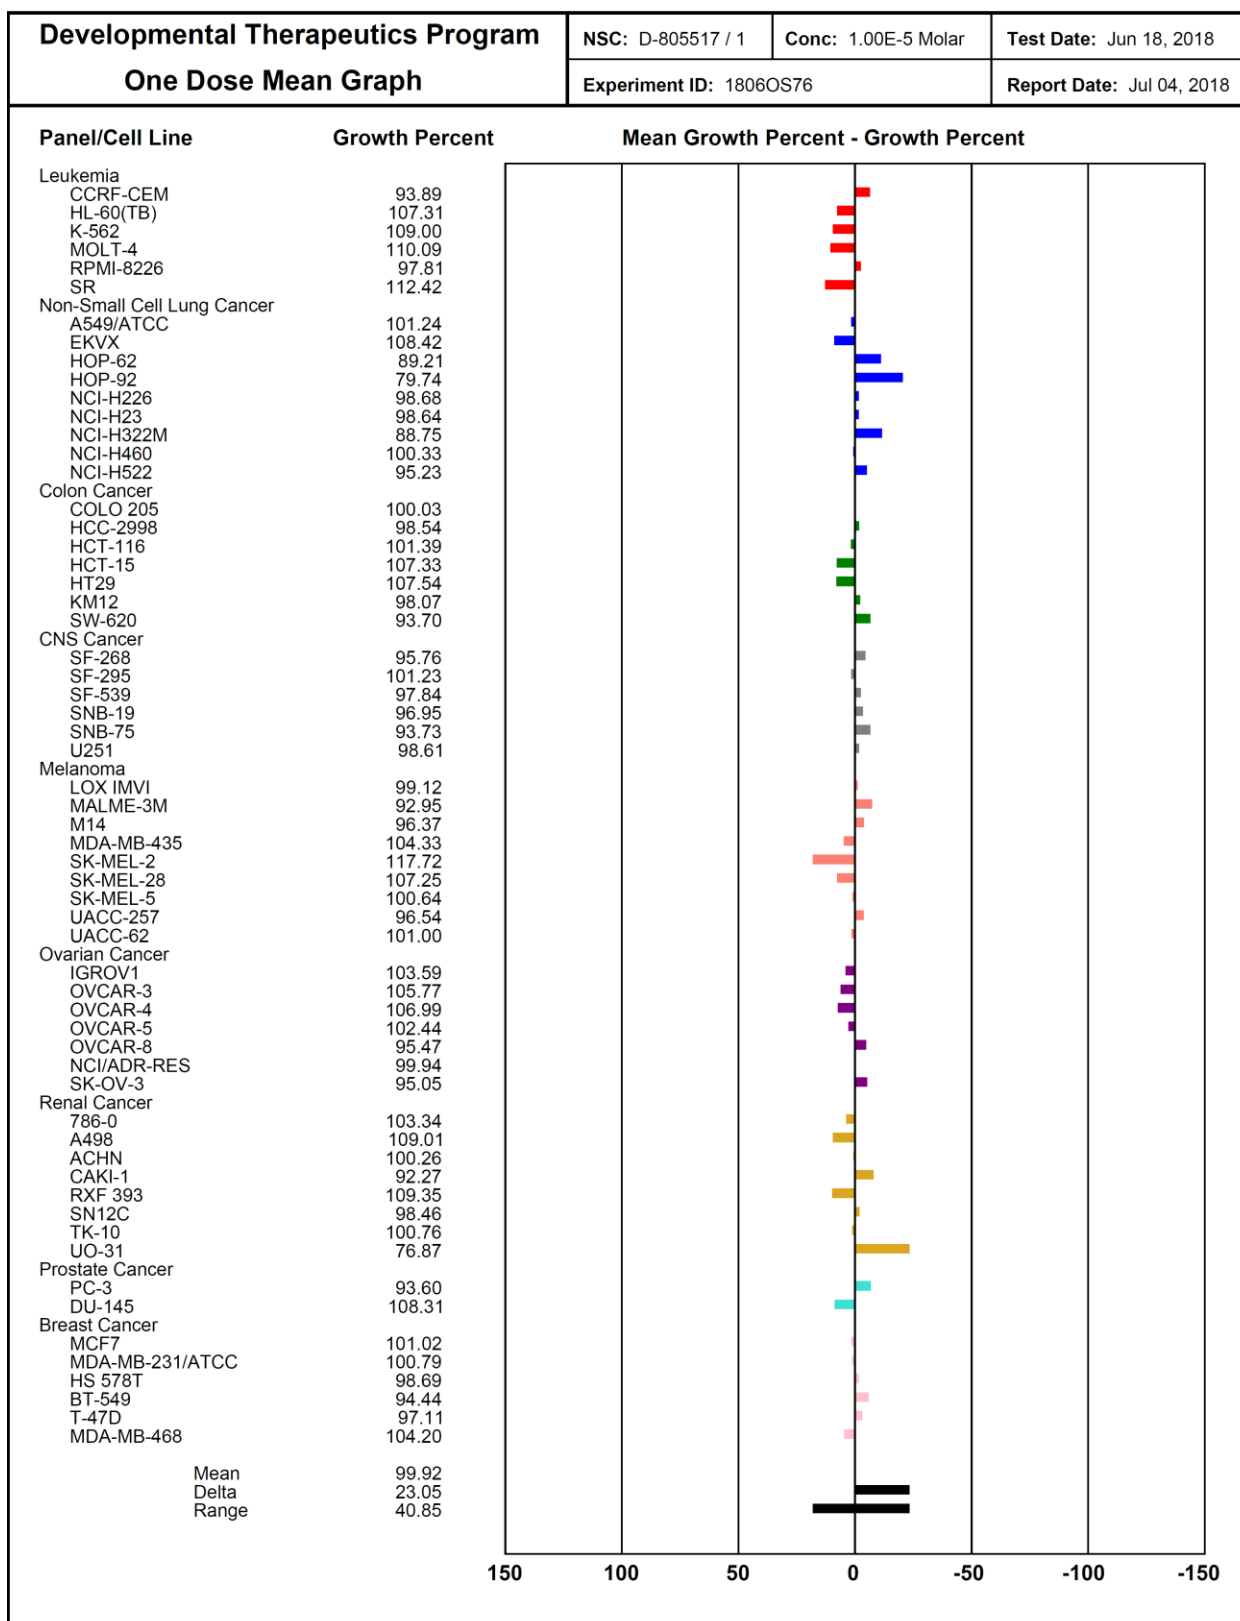

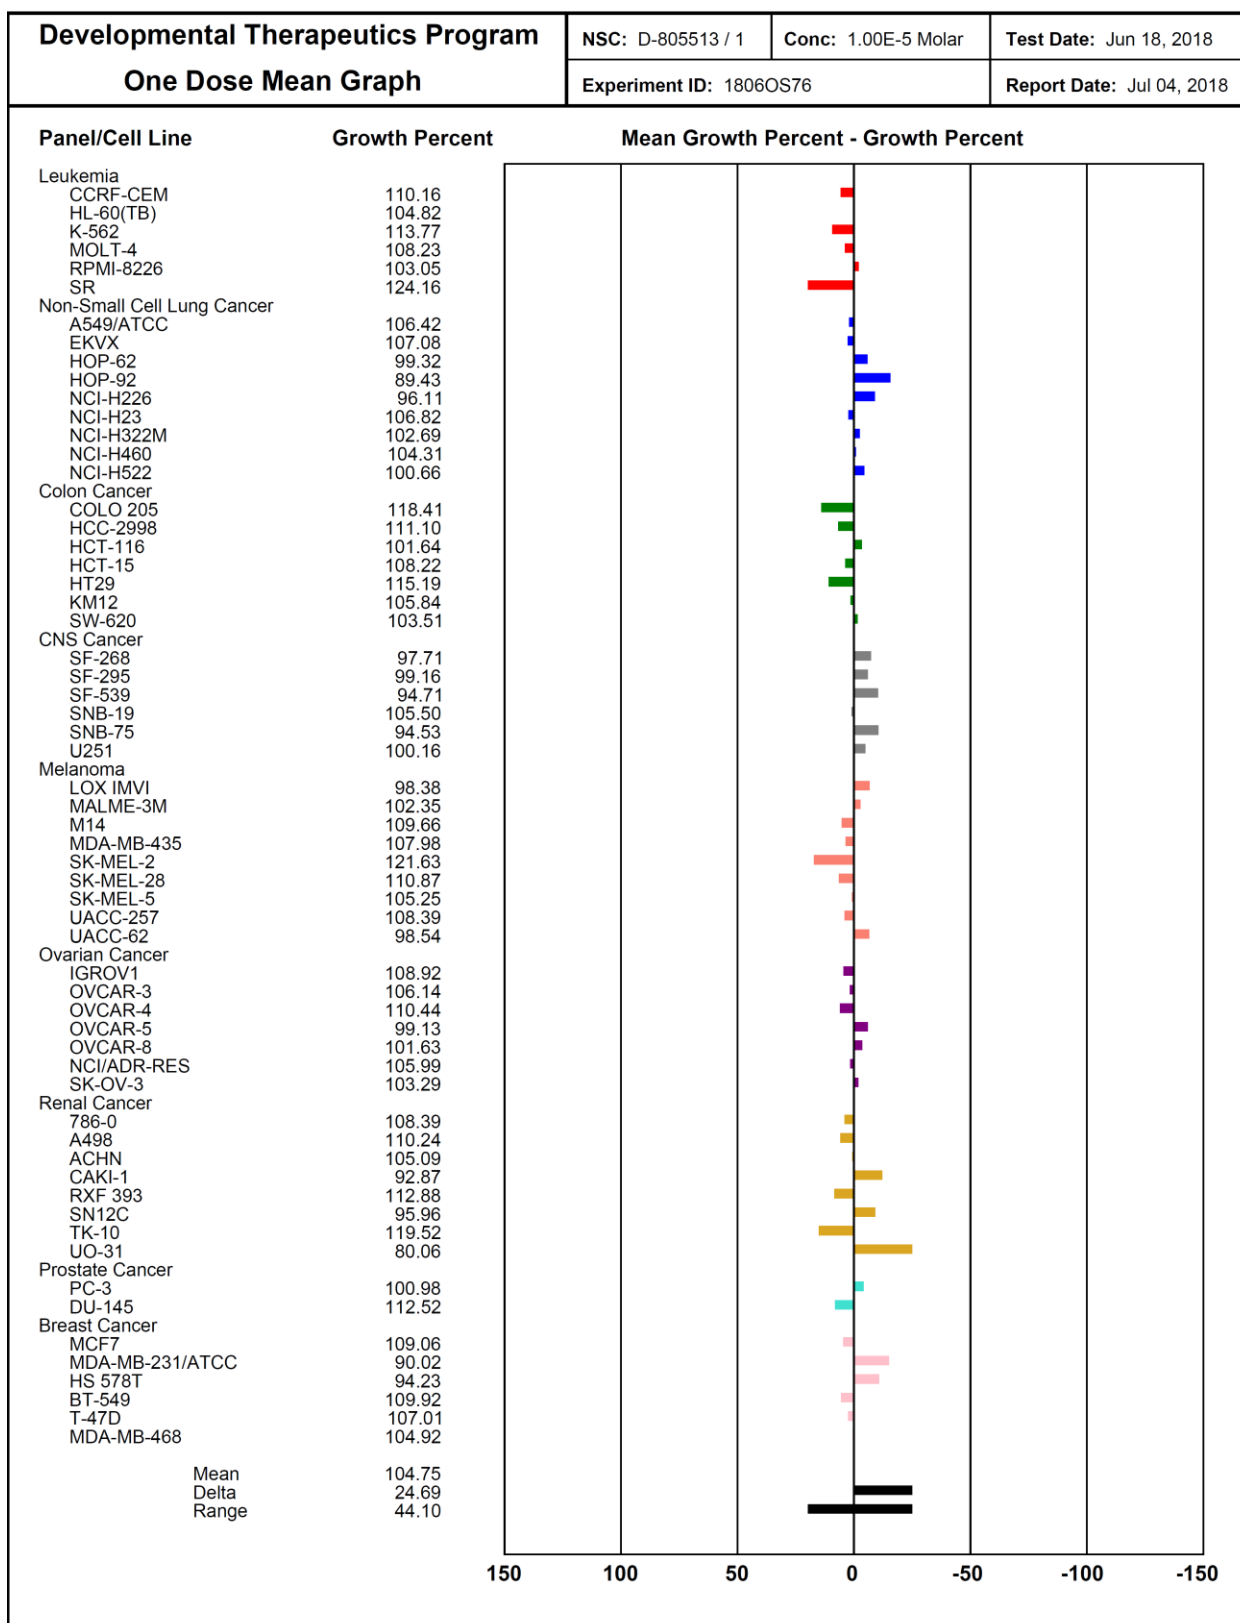



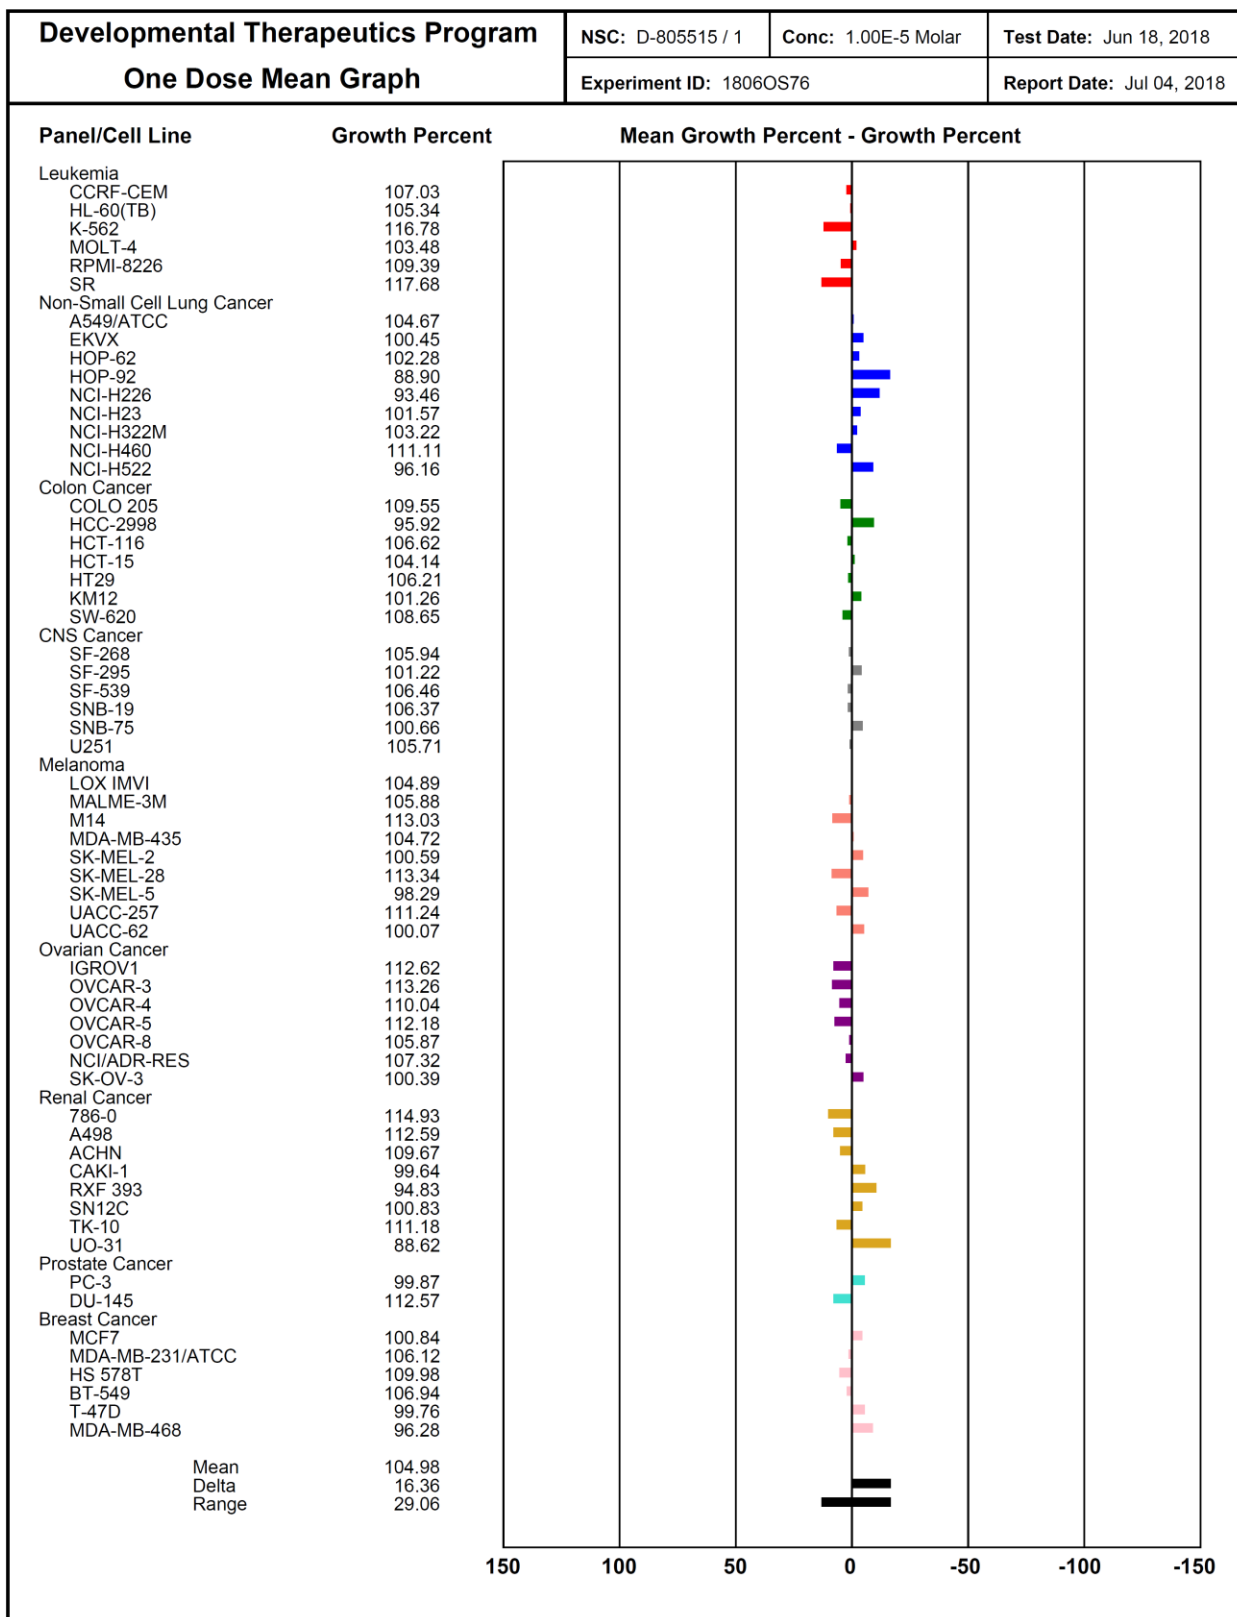

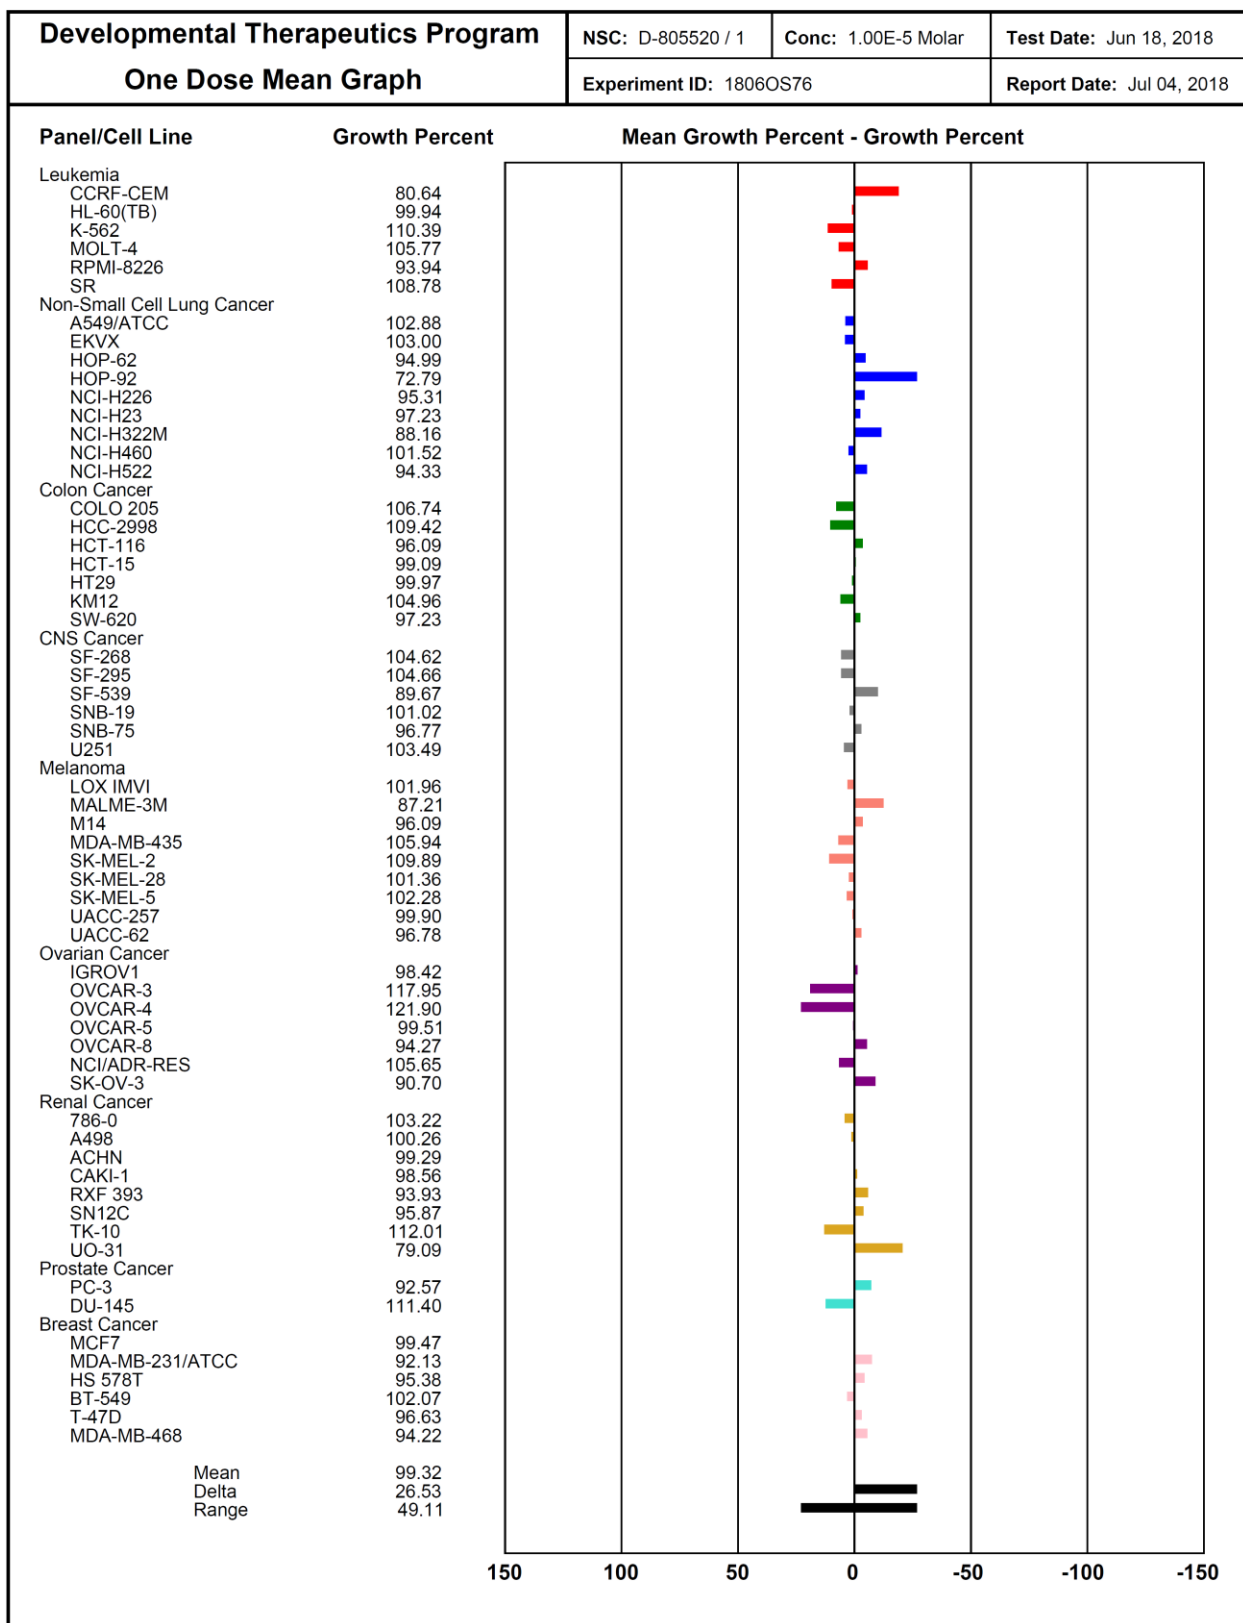

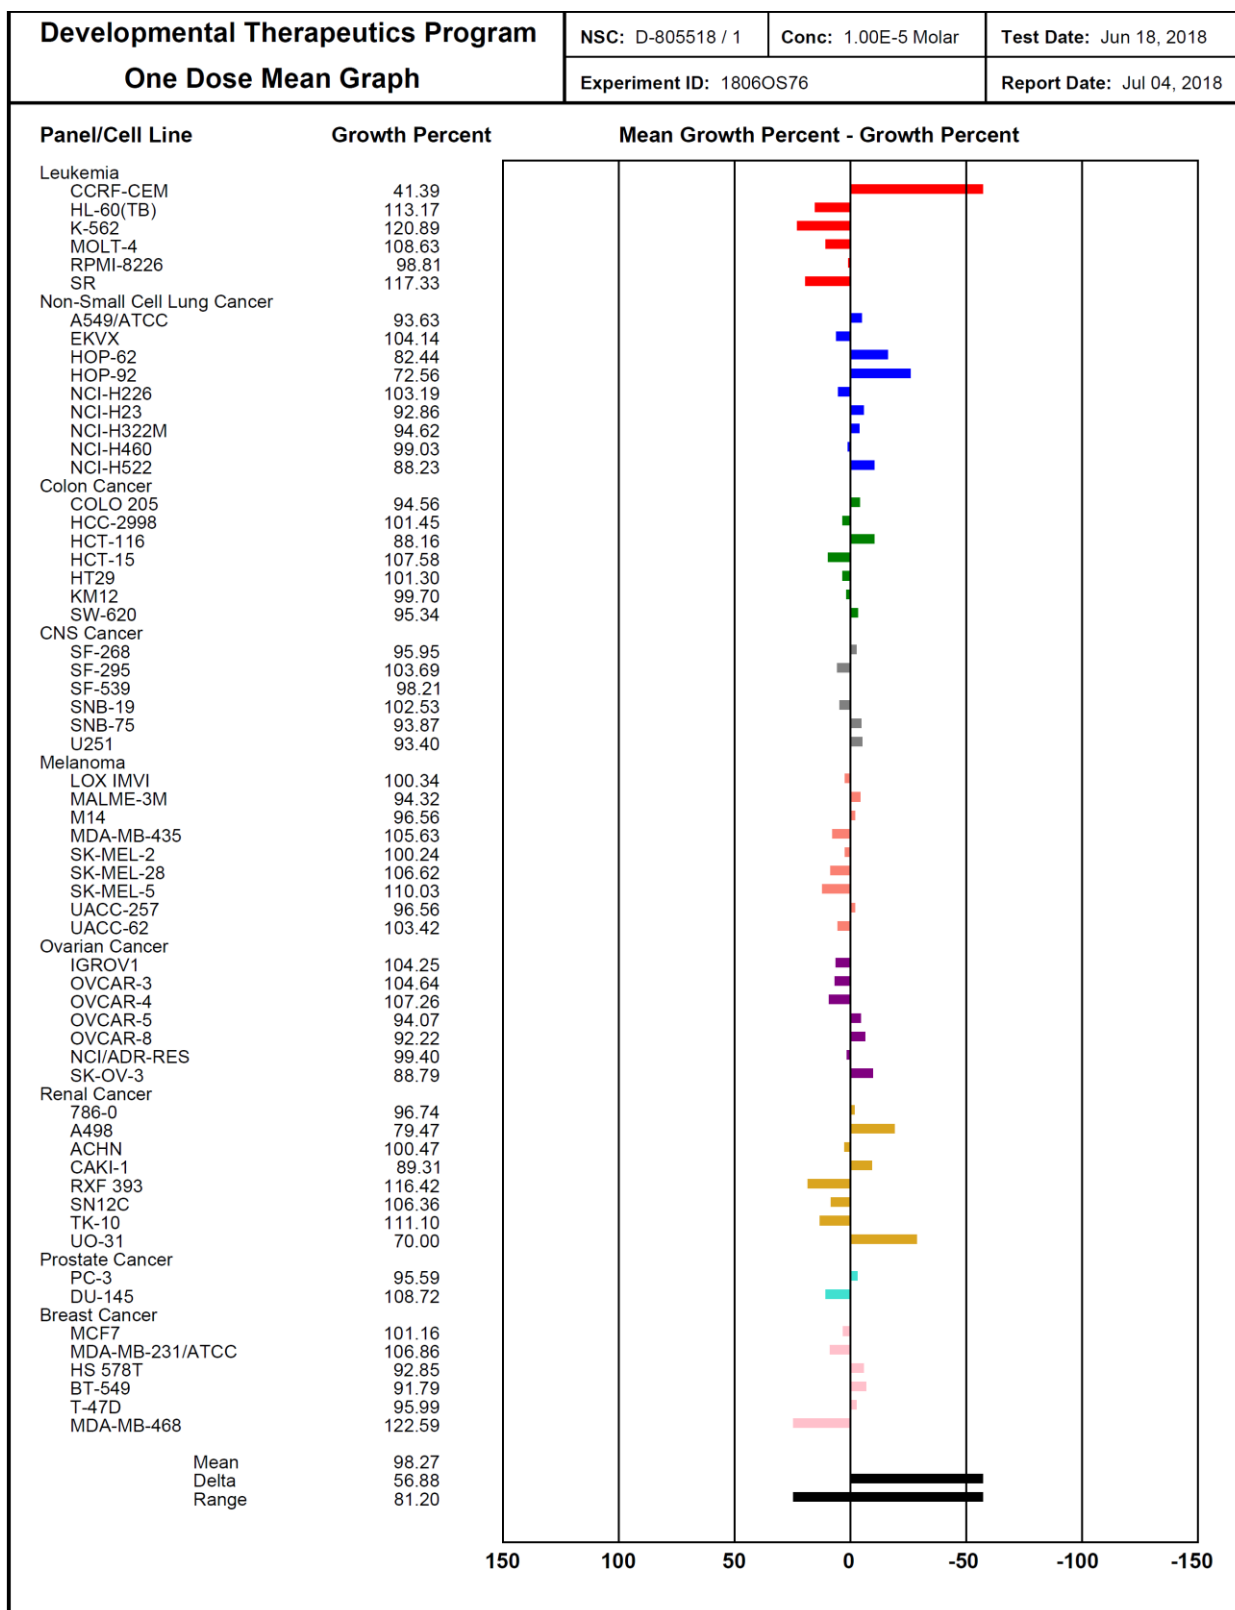

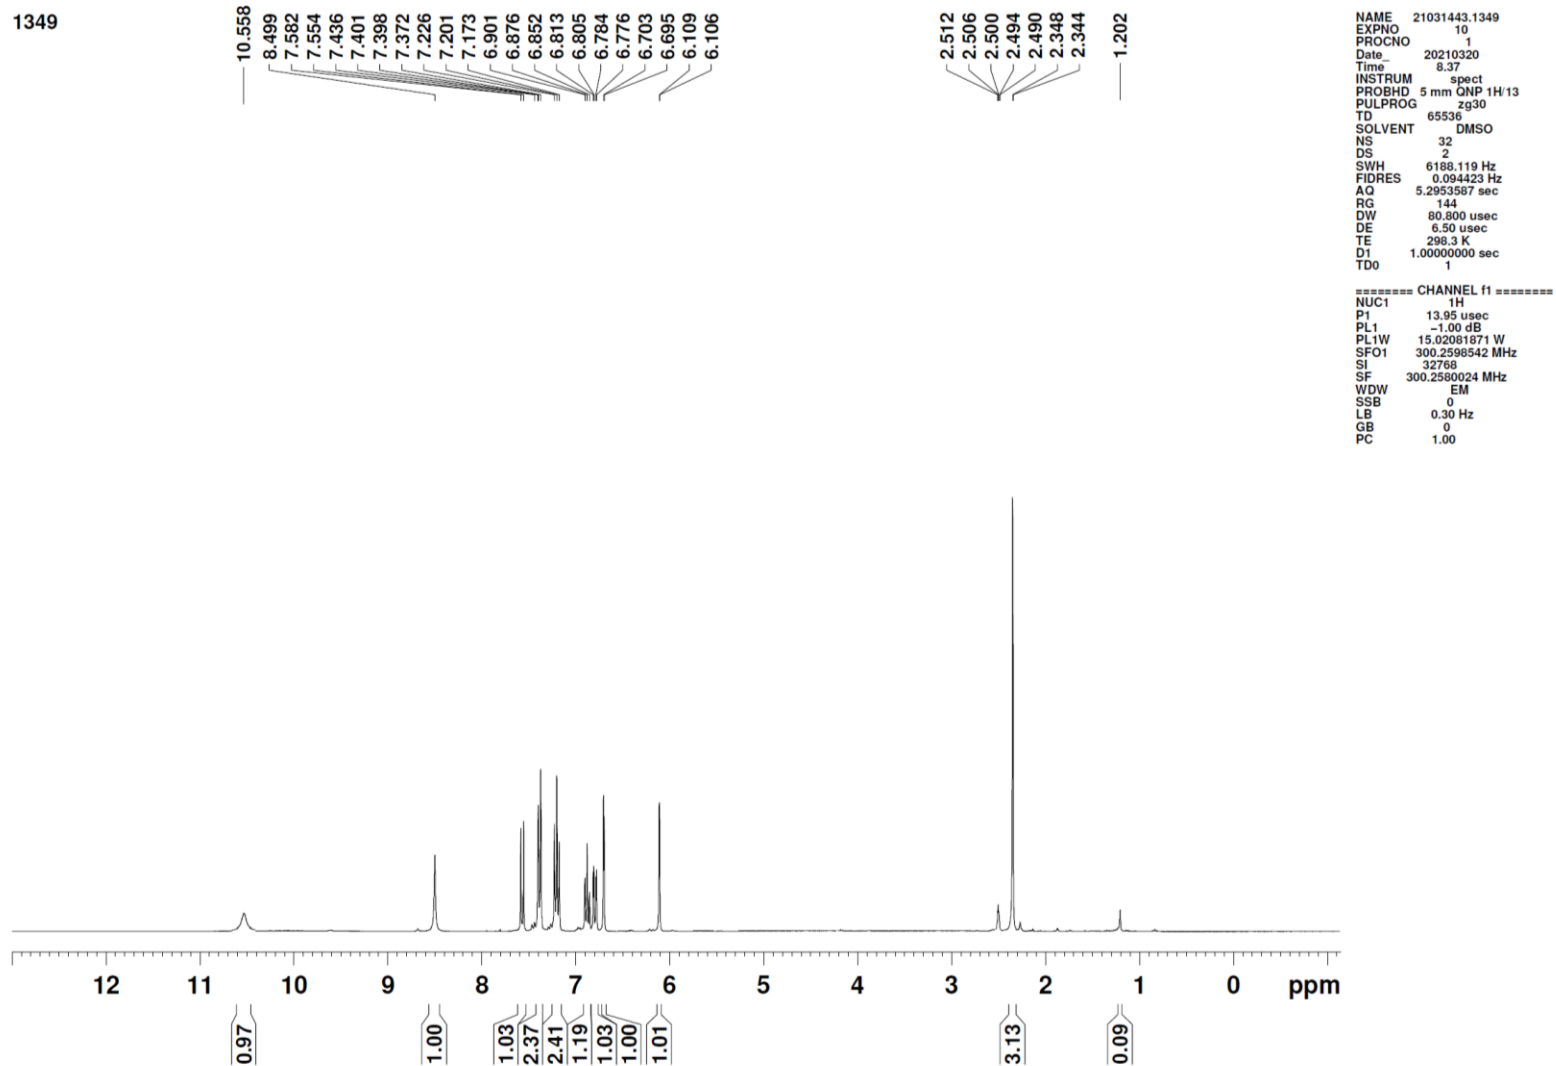

Spectra of compound 7-Hydroxy-4-methyl-2-oxo-*N*-phenylquinoline-1(2*H*)-carboxamide (**5a**)

1349

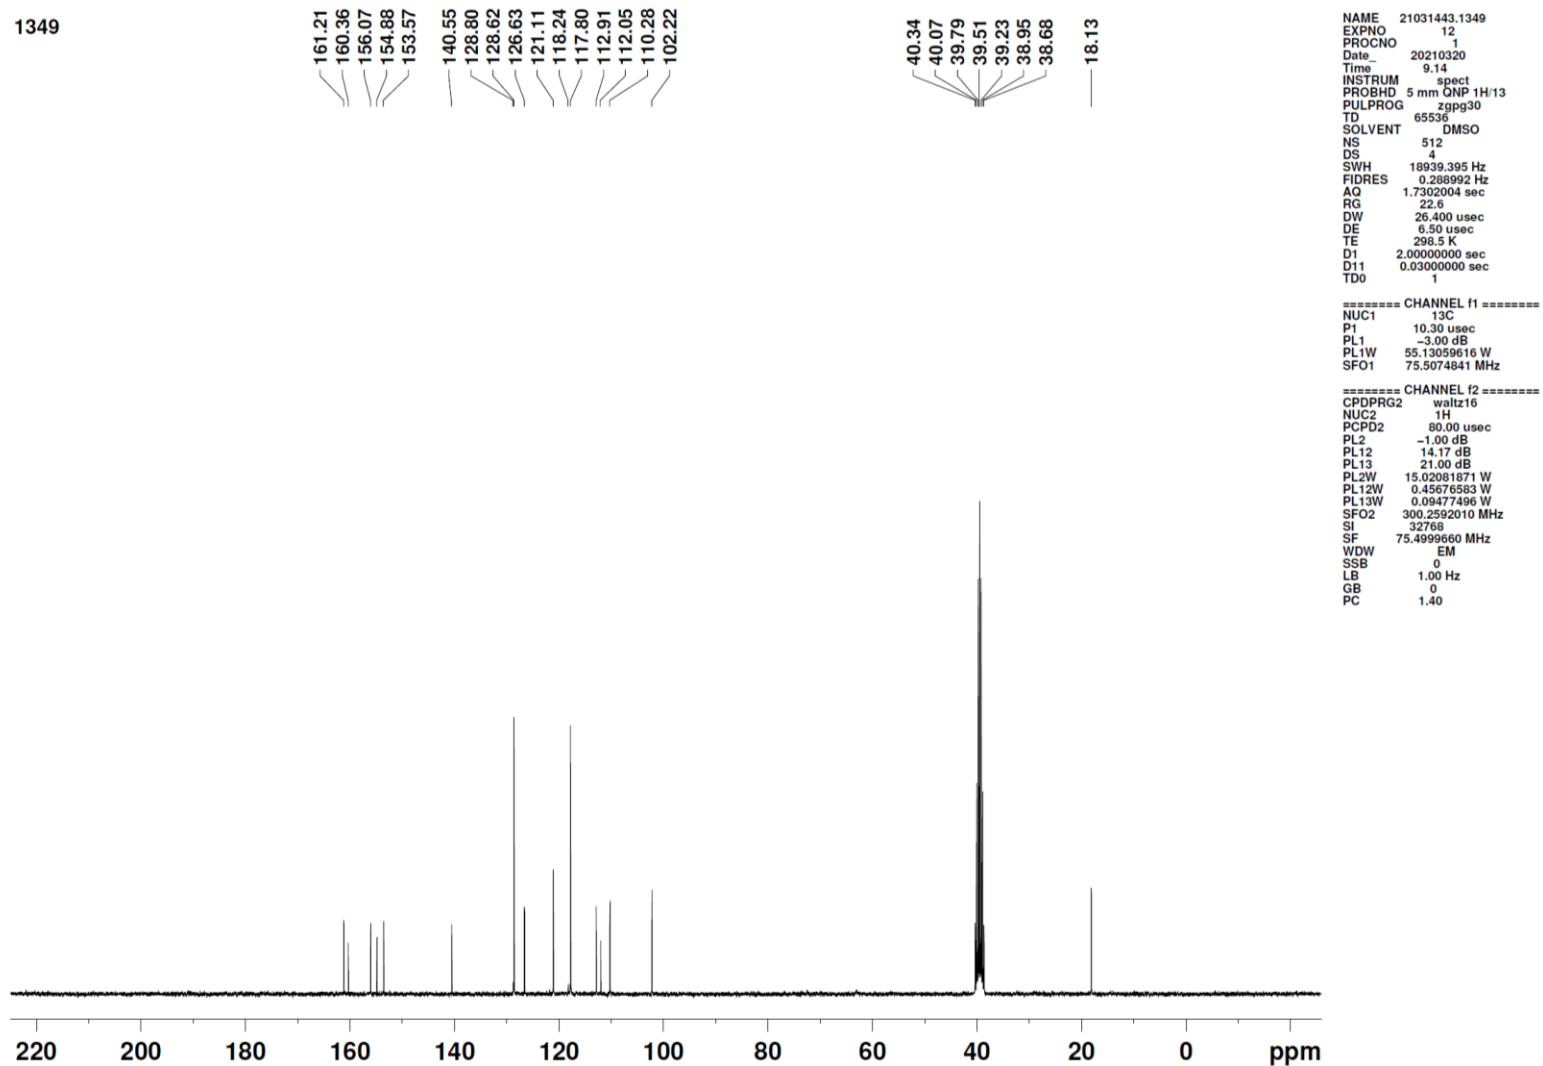Spectra of compound 7-Hydroxy-4-methyl-2-oxo-*N*-phenylquinoline-1(2*H*)-carboxamide (**5a**)



1337

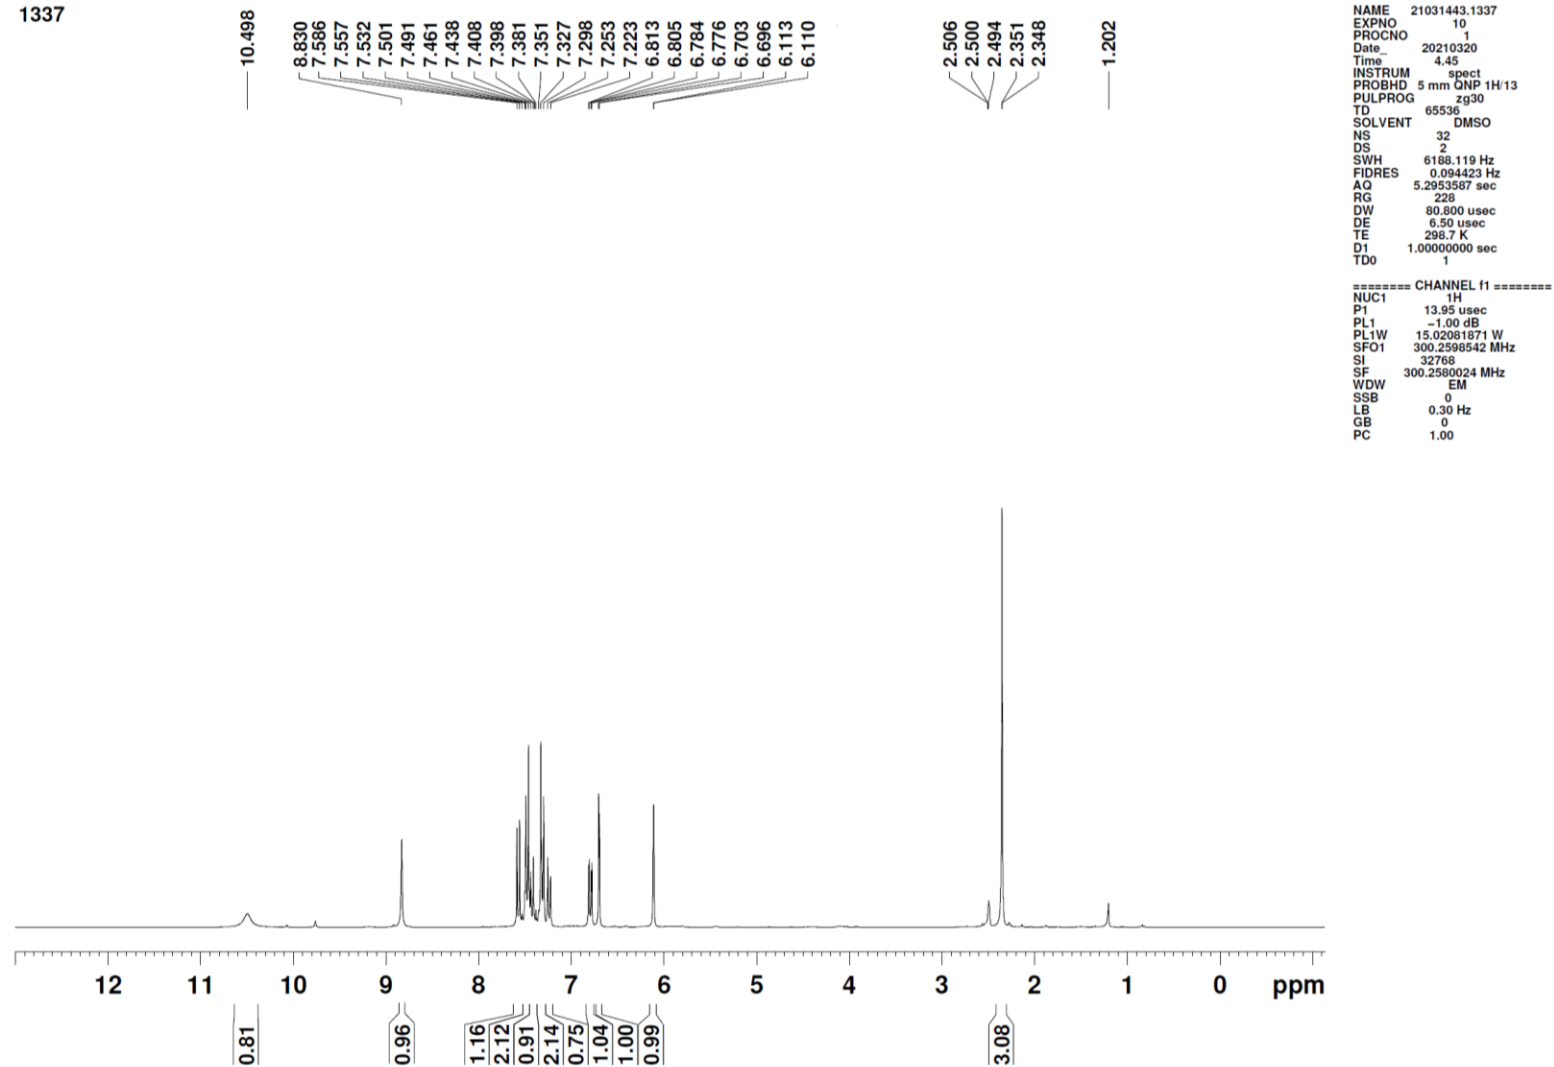Spectra of compound *N*-(4-Chlorophenyl)-7-hydroxy-4-methyl-2-oxoquinoline-1(2*H*)-carboxamide (**5b**)

1337

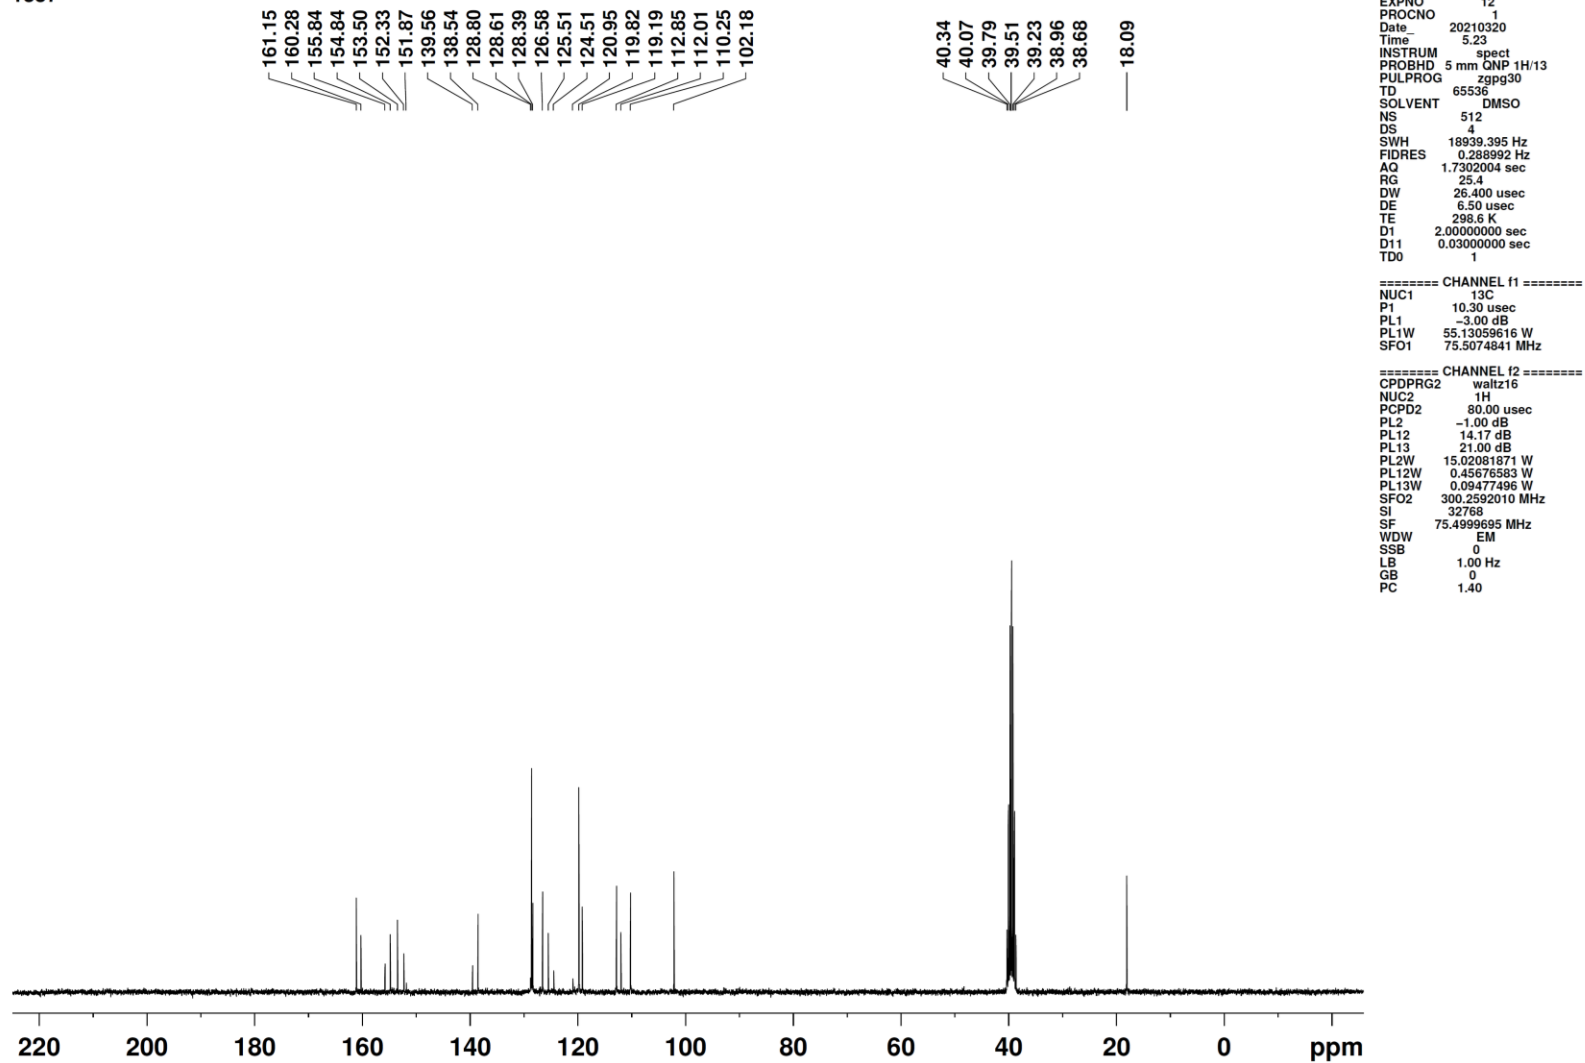Spectra of compound *N*-(4-Chlorophenyl)-7-hydroxy-4-methyl-2-oxoquinoline-1(2*H*)-carboxamide (**5b**)

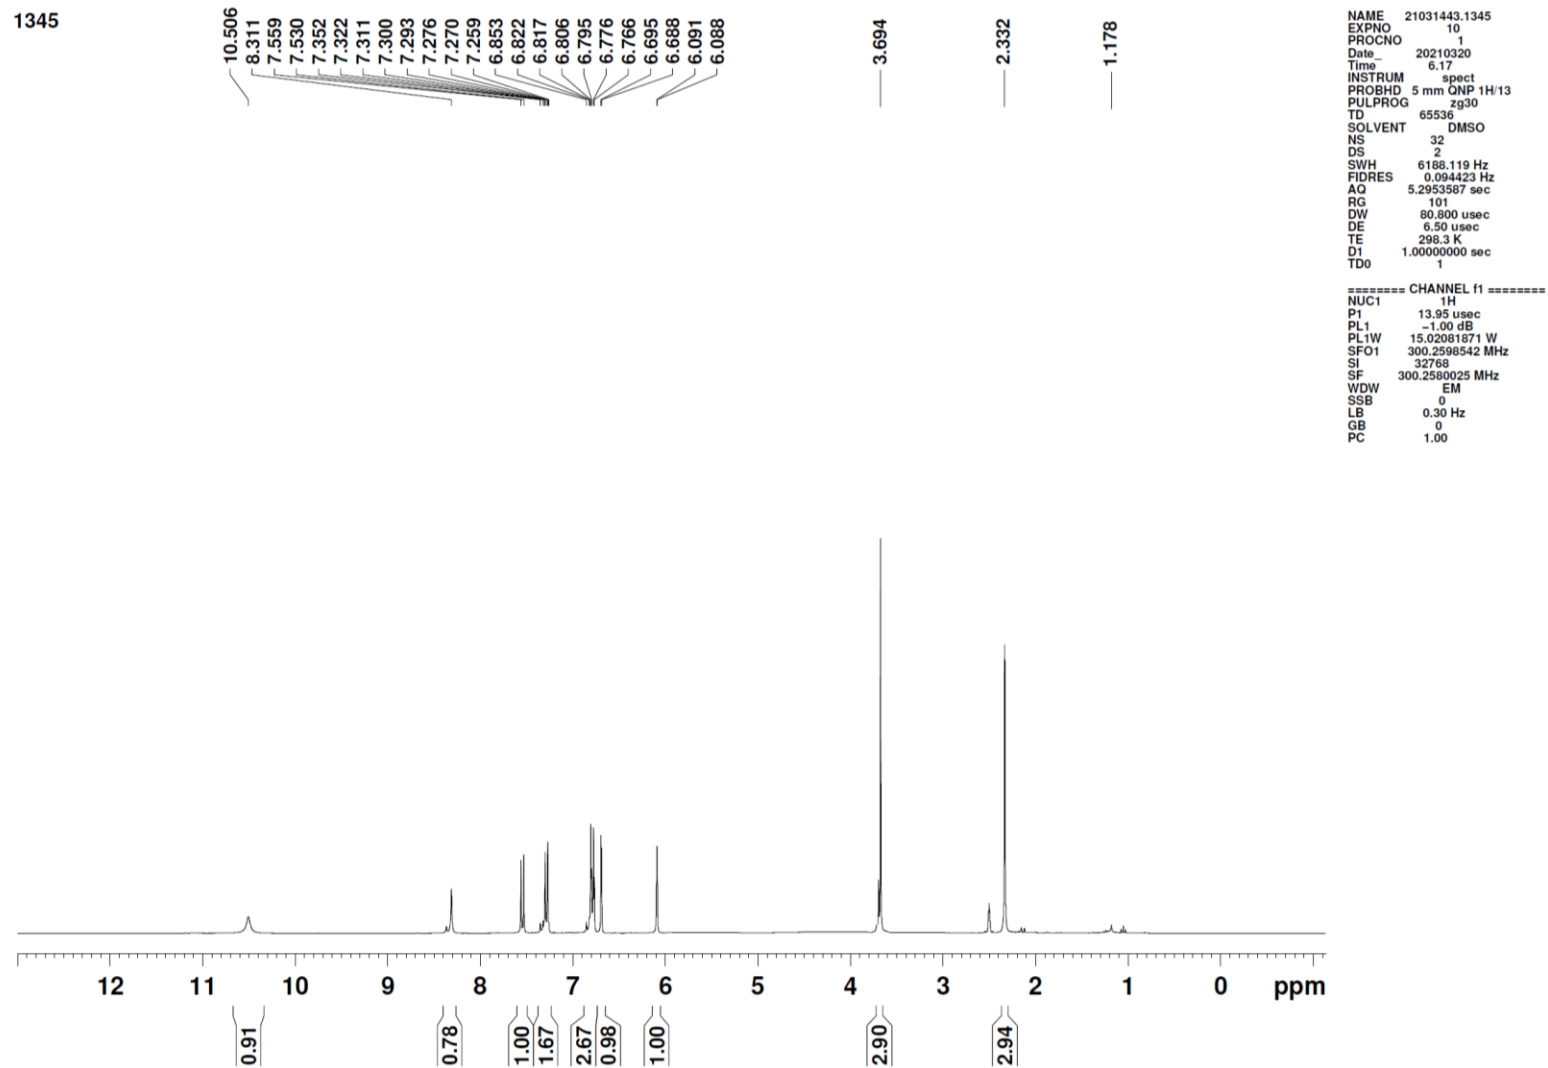

Spectra of 7-Hydroxy-*N*-(4-methoxyphenyl)-4-methyl-2-oxoquinoline-1(2*H*)-carboxamide (**5b**)

1345

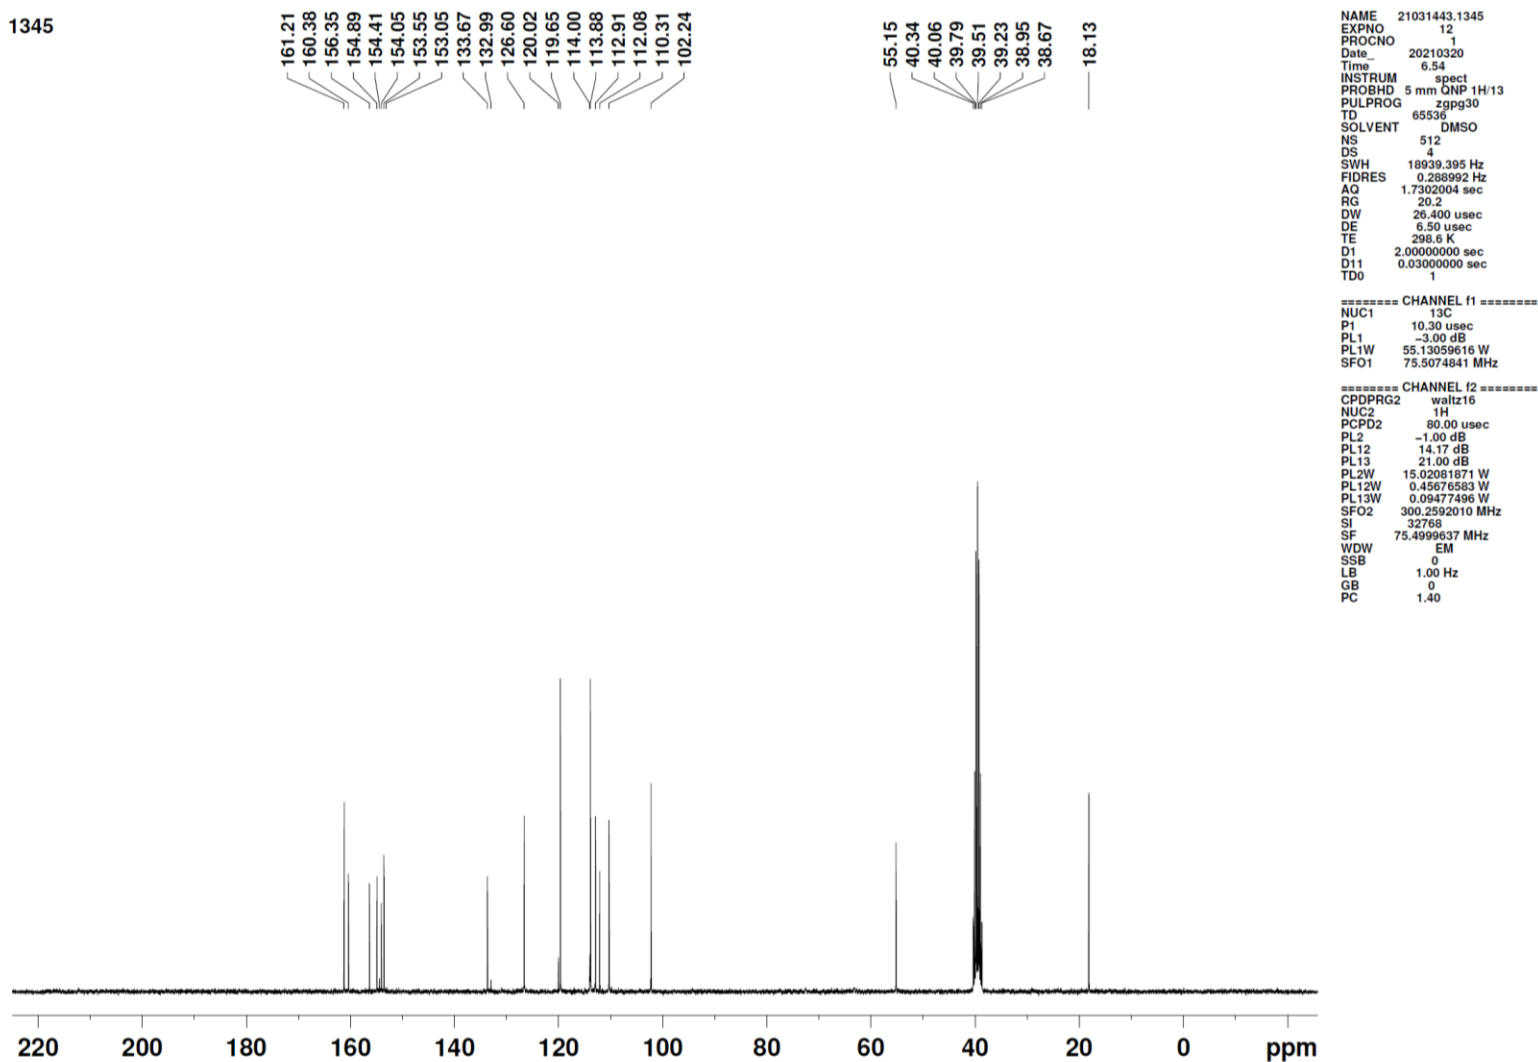Spectra of 7-Hydroxy-*N*-(4-methoxyphenyl)-4-methyl-2-oxoquinoline-1(2*H*)-carboxamide (**5b**)

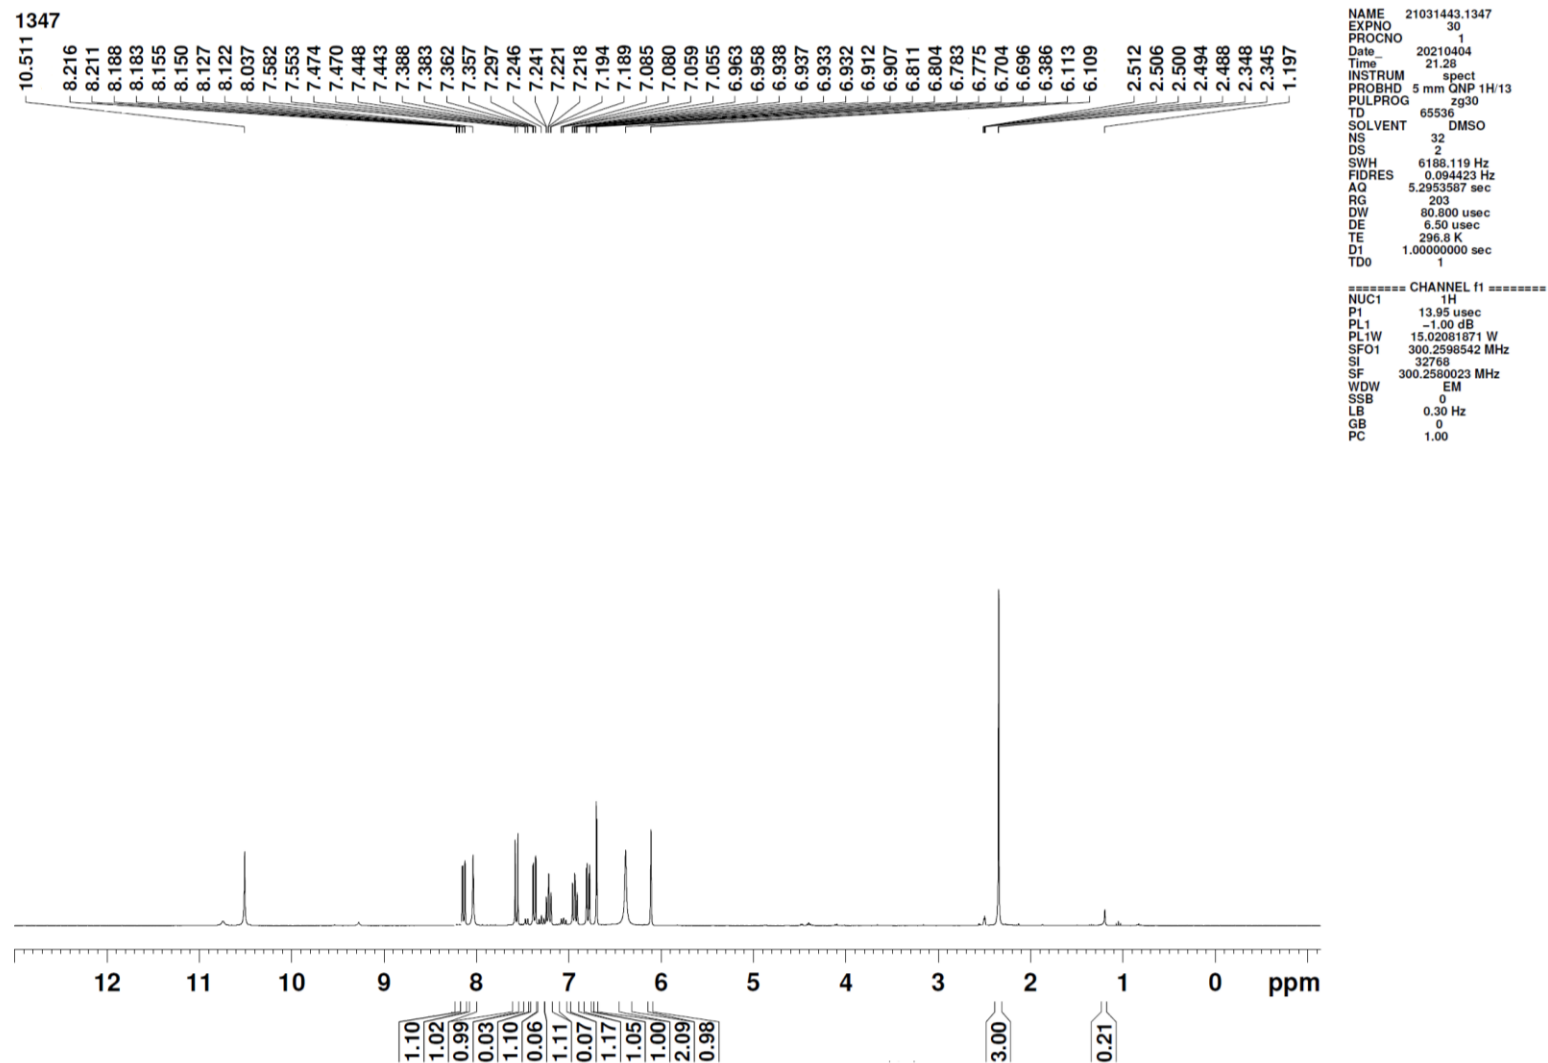

Spectra of *N*-(2-Chlorophenyl)-7-hydroxy-4-methyl-2-oxoquinoline-1(2*H*)-carboxamide (**5f**)



1347

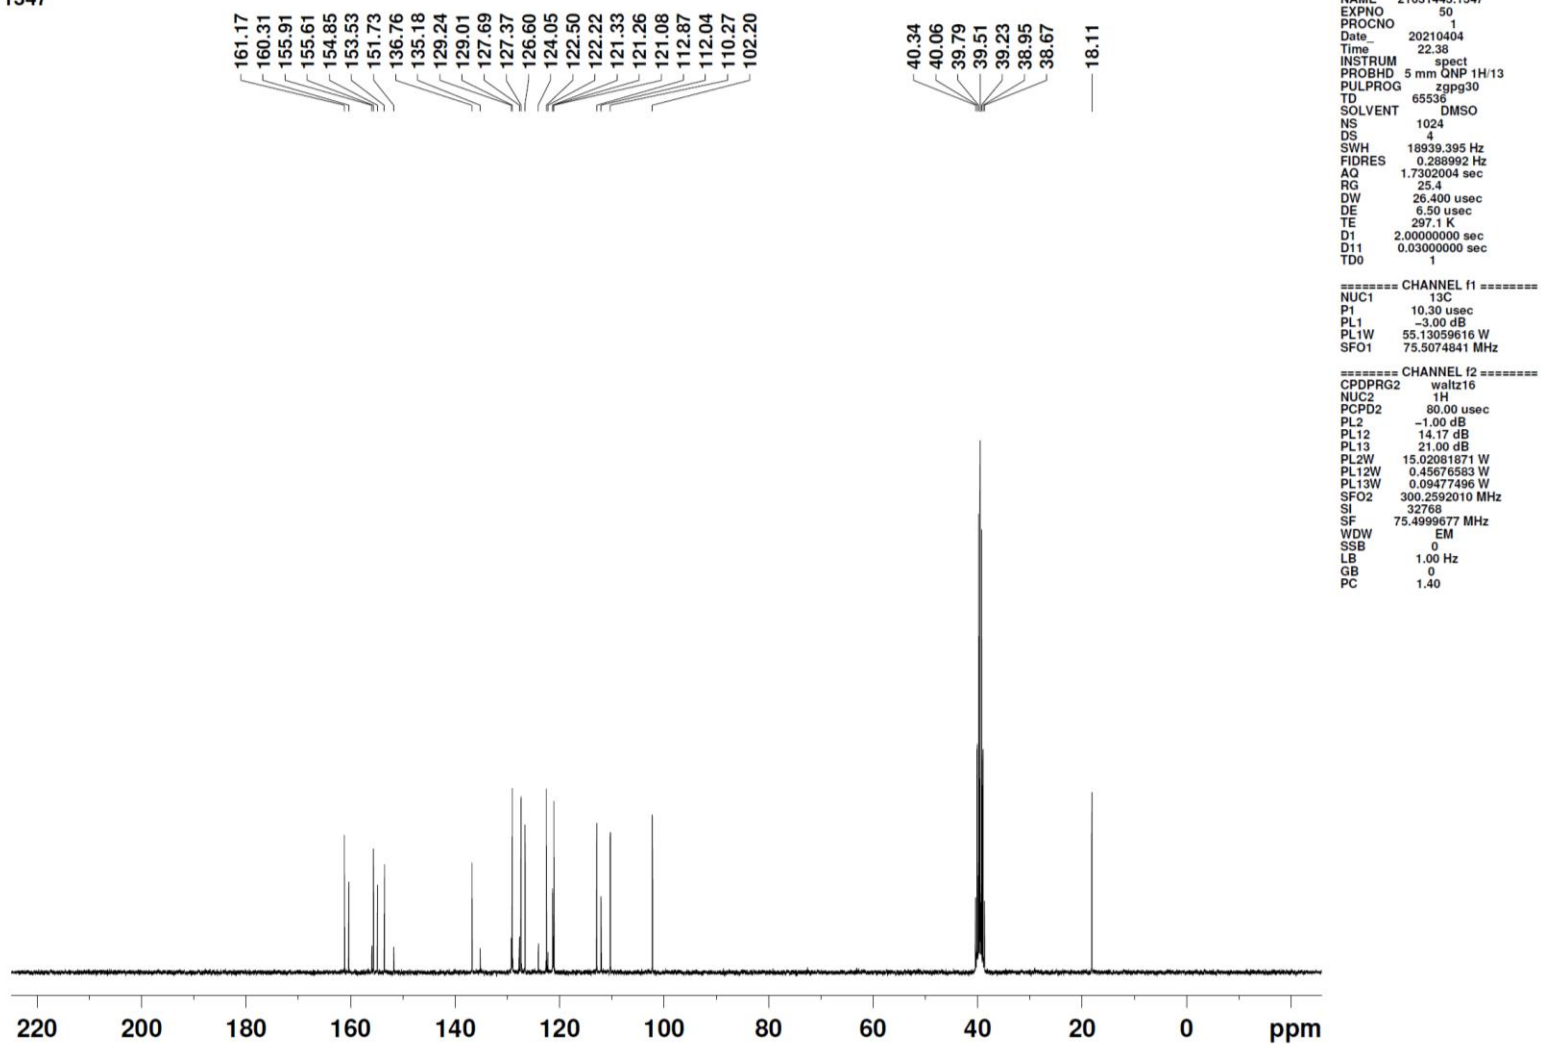Spectra of *N*-(2-Chlorophenyl)-7-hydroxy-4-methyl-2-oxoquinoline-1(2*H*)-carboxamide (**5f**)

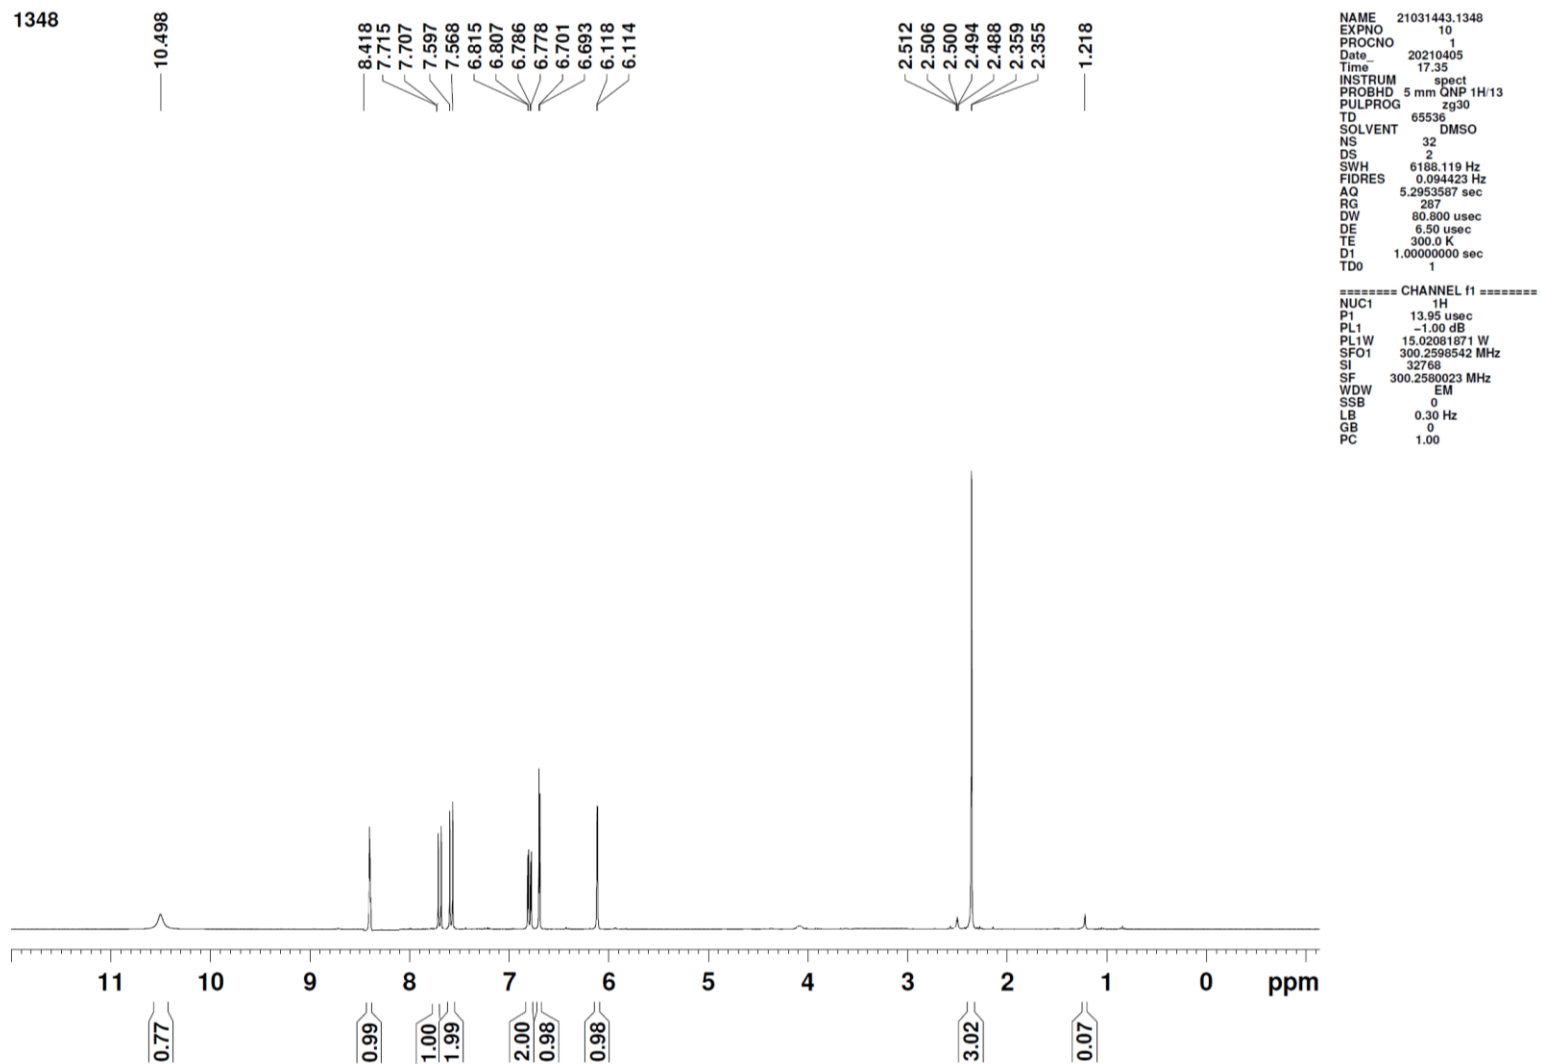

Spectra of *N*-(3-Chloro-4-fluorophenyl)-7-hydroxy-4-methyl-2-oxoquinoline-1(2*H*)-carboxamide (**5j**)

1348

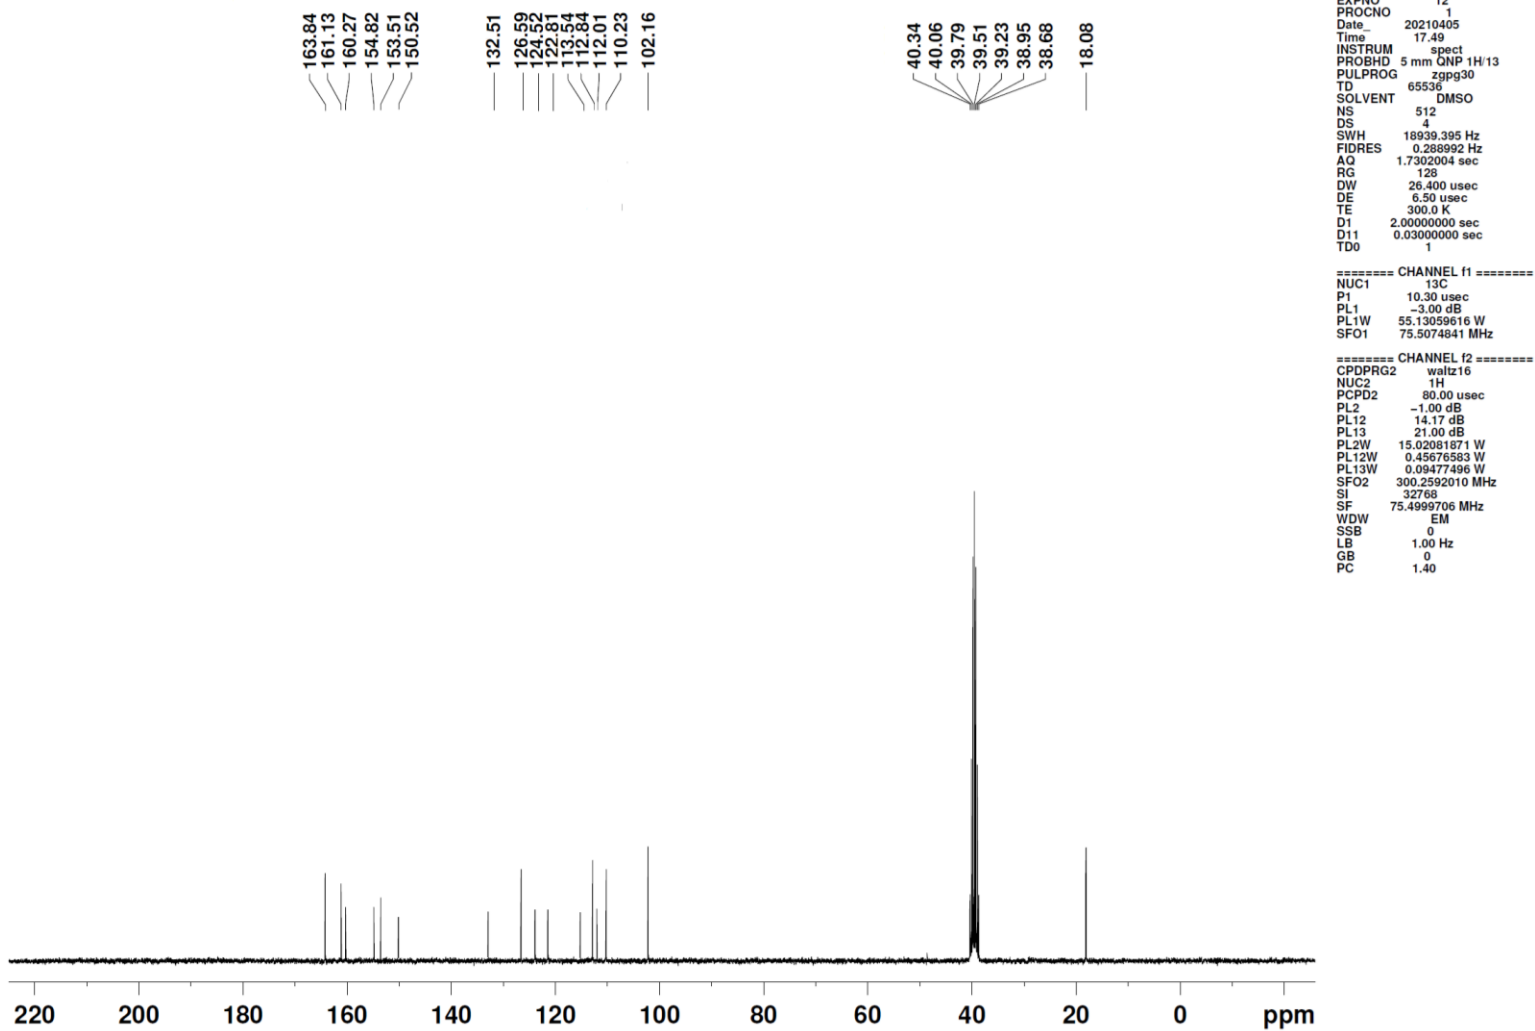Spectra of *N*-(3-Chloro-4-fluorophenyl)-7-hydroxy-4-methyl-2-oxoquinoline-1(2*H*)-carboxamide (**5j**)
